1 **GLKs directly regulate carotenoid biosynthesis via interacting with GBFs in**  
2 **nuclear condensates in plants**

3  
4 Tianhu Sun<sup>1,2,\*</sup>, Shaohua Zeng<sup>1,3</sup>, Xin Wang<sup>4</sup>, Lauren A. Owens<sup>1</sup>, Zhangjun Fe<sup>1,4</sup>, Yunde Zhao<sup>5</sup>,  
5 Michael Mazourek<sup>2</sup>, James G. Giovannoni<sup>1,4</sup>, Li Li<sup>1,2,\*</sup>  
6

7 <sup>1</sup> Robert W. Holley Center for Agriculture and Health, USDA-ARS, Cornell University, Ithaca,  
8 New York 14853, USA

9 <sup>2</sup> Plant Breeding and Genetics Section, School of Integrative Plant Science, Cornell University,  
10 Ithaca, New York 14853, USA

11 <sup>3</sup> Key Laboratory of South China Agricultural Plant Molecular Analysis and Genetic  
12 improvement, South China Botanical Garden, Chinese Academy of Sciences, Guangzhou  
13 510650, China

14 <sup>4</sup> Boyce Thompson Institute, Ithaca, NY 14853, USA

15 <sup>5</sup> Section of Cell and Developmental Biology, University of California, San Diego, La Jolla, CA  
16 92093, USA

17  
18 \* Corresponding author:

19 Li Li

20 Tel: +1-607-255-5708

21 Email: [ll37@cornell.edu](mailto:ll37@cornell.edu)

22 ORCID: 0000-0002-4352-4061

23

24 Tianhu Sun

25 Email: [thsun753@gmail.com](mailto:thsun753@gmail.com)

26 ORCID ID: 0000-0002-2513-1387

27

28 **One-sentence summary:** GLKs transcriptionally regulate photosynthetic pigment synthesis in a  
29 GBF-dependent manner and are associated with the formation of phase separation-mediated  
30 nuclear condensates.

31

32 **Short title:** GLK-GBF complex regulates carotenoid biosynthesis

33

34  
35  
36  
37  
38  
39  
40  
41  
42  
43  
44  
45  
46  
47  
48  
49  
50  
51  
52  
53  
54

**ABSTRACT**

Carotenoids are vital photosynthetic pigments for plants and provide essential nutrients for humans. However, our knowledge of the regulatory control of carotenoid biosynthesis remains limited. Golden2-like transcription factors (GLKs) are widely recognized as essential and conserved factors for chloroplast development and the major regulators of chlorophyll biosynthesis. Yet the molecular mechanisms by which GLKs transcriptionally activate their target genes are unclear. Here, we report that GLKs directly regulate carotenoid biosynthesis in a G-box Binding Factor (GBF)-dependent manner. Both *in vitro* and *in vivo* studies reveal that GLKs physically interact with GBFs. Through the direct binding of GBFs to the G-box motif, the GLK-GBF regulatory module transcriptionally activates *phytoene synthase (PSY)*, the gene encoding the rate-limiting enzyme for carotenoid biosynthesis. The ability of *GLKs* to promote carotenoid and chlorophyll biosynthesis is greatly diminished in the *Arabidopsis gbf1/2/3* triple knockout mutants, showing the requirement of GBFs for GLK function. GLKs and GBFs form liquid-liquid phase separation-mediated nuclear condensates as the compartmented and concentrated transcriptional complexes. Our findings uncover a novel and conserved regulatory module for photosynthetic pigment biosynthesis through formation of GLK-GBF transcriptional complexes and nuclear biomolecular condensates in plants.

## 55 INTRODUCTION

56 Carotenoids play critical roles in the photosynthesis of all green plants as antenna and  
57 photoprotection pigments, and provide essential nutrients and phytonutrients for human health.  
58 Nearly all of the major genes and the enzymes catalyzing the core reactions of carotenoid  
59 biosynthesis had been characterized by the end of the last century (Cunningham Jr and Gantt,  
60 1998). However, the regulatory control of carotenogenesis is not well understood (Sun and Li,  
61 2020). Because transcriptional regulation represents the first and primary layer of control,  
62 transcriptional regulation of carotenoid structural gene expression has been a main focus of  
63 carotenoid research. In recent years, a number of transcription factors (TFs) have been reported  
64 to regulate the expression of carotenoid biosynthetic genes (Toledo-Ortiz et al., 2010; Toledo-  
65 Ortiz et al., 2014; Bou-Torrent et al., 2015; Xiong et al., 2019; Wu et al., 2020; Lu et al., 2021;  
66 Zhu et al., 2021a). However, most of these TFs appear to be species-specific regulators with little  
67 consensus across plant species (Stanley and Yuan, 2019; Sun et al., 2022a). Therefore, the  
68 common master regulators of carotenoid biosynthesis remain to be elucidated.

69 Phytoene synthase (PSY) catalyzes the first committed step of carotenoid biosynthesis  
70 and is considered to be a rate-limiting bottleneck in the pathway (Zhou et al., 2022). As such,  
71 transcriptional and post-transcriptional regulation of PSY has been intensively studied (Toledo-  
72 Ortiz et al., 2010; Zhou et al., 2015b; Álvarez et al., 2016; Welsch et al., 2018). In green leaves,  
73 light signaling is the most important environmental cue to affect photosynthetic pigment  
74 biosynthesis in chloroplasts. Phytochrome-interacting factors (PIFs), a family of bHLH  
75 transcription factors, and the bZIP transcription factor LONG HYPOCOTYL 5 (HY5) have been  
76 shown to mediate light-regulated carotenogenesis by binding to a G-box motif in the *PSY*  
77 promoter in antagonistic ways during deetiolation (Toledo-Ortiz et al., 2010; Toledo-Ortiz et al.,  
78 2014; Bou-Torrent et al., 2015).

79 Golden2-like (GLK) transcription factors belong to a conserved plant-specific GARP  
80 (Golden2, ARR-B, Psr1) family of MYB transcription factors. They are established as essential  
81 and conserved factors with pivotal roles in regulating chloroplast development in the plant  
82 kingdom (Chen et al., 2016). GLKs exert their functions by regulating the expression of  
83 chloroplast-targeted and photosynthesis-related nuclear genes (Rossini et al., 2001; Fitter et al.,  
84 2002; Waters et al., 2009; Powell et al., 2012; Nguyen et al., 2014; Yeh et al., 2022). Through a  
85 large-scale ChIP-seq analysis in maize leaves, GLKs were identified as top level regulators of

86 the chlorophyll biosynthetic pathway (Tu et al., 2020). Overexpression of *GLKs* results in  
87 chloroplast development ectopically in non-photosynthetic organs of roots (Kobayashi et al.,  
88 2012; Kobayashi et al., 2013) and calli (Nakamura et al., 2009), and promotes chloroplast  
89 development to produce dark-green tomato fruit (Powell et al., 2012; Nguyen et al., 2014).  
90 Overexpression of *GLKs* has also been shown to boost chloroplast development and  
91 photosynthesis resulting in increased biomass and grain yield in rice (Li et al., 2020; Yeh et al.,  
92 2022).

93 *GLKs* were initially defined by GOLDEN2 in maize (*Zea mays*) (Rossini et al., 2001). In  
94 many plant species such as Arabidopsis, maize, and moss, *GLK* genes exist as paralogous pairs  
95 and *GLK1* and *GLK2* are functional redundant (Rossini et al., 2001; Fitter et al., 2002; Yasumura  
96 et al., 2005; Waters et al., 2008). In Arabidopsis, the *glk1 glk2* double mutant exhibits a pale  
97 green phenotype with small chloroplasts lacking thylakoid grana (Waters et al., 2009). The  
98 impaired chloroplast development likely results from defective binding to a set of nuclear-  
99 encoded photosynthetic genes, in particular the light harvesting and chlorophyll biosynthetic  
100 genes (Waters and Langdale, 2009). Although *GLKs* are well established to regulate chlorophyll  
101 biosynthesis, whether *GLK1* and *GLK2* directly regulate genes involved in carotenoid  
102 biosynthesis to coordinate photosynthetic pigment synthesis is not known. Moreover, the  
103 molecular mechanisms by which *GLKs* transcriptionally activate their target genes is also not  
104 fully understood despite having been subjected to intensive investigations.

105 Previous studies showed potential interactions between *GLKs* and the bZIP transcription  
106 factors GBF1, GBF2, and GBF3 (Tamai et al., 2002). GBF1, GBF2, and GBF3 belong to group  
107 G bZIP transcription factors (Corrêa et al., 2008; Dröge-Laser et al., 2018). Among the group G  
108 bZIP transcription factors, GBF1 has been known for its role in light response and leaf  
109 senescence (Smykowski et al., 2010; Singh et al., 2012). *In-silico* analysis of the light response  
110 and leaf senescence genes, including chlorophyll and carotenoid biosynthetic pathway genes,  
111 reveals the high frequency of G-box motifs (Jin et al., 2021). Previous studies show that the  
112 function of group G bZIP transcription factors largely depends on the interaction partners (Llorca  
113 et al., 2015). Therefore, the potential interaction between *GLKs* and GBFs suggests a possible  
114 synergistic effect of these two groups of transcription factors in regulating photosynthetic genes  
115 with G-box motifs in the promoter regions.

116 Many nuclear processes such as gene transcription, RNA processing, and chromatin  
117 remodeling occur within condensates or non-membrane compartments, which compartmentalize  
118 and concentrate the required biomolecules for each process in the nucleus (Banani et al., 2017;  
119 Sabari et al., 2020). Recent research on liquid-liquid phase separation (LLPS) highlights the  
120 prominent role of LLPS in driving the formation of condensates in cells and facilitating the  
121 dynamic assembly and concentration of biomolecules such as RNA and proteins for  
122 transcriptional regulation (Emenecker et al., 2021; Kim et al., 2021). Emerging evidence  
123 suggests that nuclear condensates formed via LLPS directly regulate gene expression in plants  
124 (Fang et al., 2019; Zhu et al., 2021b), and represent a widespread mechanism to spatiotemporally  
125 coordinate transcriptional activity in cells (Emenecker et al., 2021).

126 In this study, we show that GLKs directly regulate carotenoid biosynthesis and elucidate  
127 a regulatory module in which GLKs and GBFs mediate photosynthetic pigment synthesis. GLKs  
128 physically interact with GBFs to activate transcription of *PSY*, the first committed step of  
129 carotenoid biosynthesis. GBFs directly bind to the G-box motifs of the *PSY* promoter and form a  
130 GLK-GBF regulatory module. The GLK-GBF complexes promote the formation of nuclear  
131 condensates via LLPS. Loss of GBFs impairs GLK function in regulating carotenoid and  
132 chlorophyll biosynthesis. These findings reveal a novel mechanism of transcriptional regulation  
133 of photosynthetic pigment biosynthesis through formation of GLK-GBF transcription complexes  
134 and nuclear biomolecular condensates via LLPS.

135

## 136 **RESULTS**

### 137 **GLKs regulate carotenoid biosynthesis independent of chlorophyll synthesis**

138 To examine the function of GLKs in photosynthetic pigment biosynthesis, we first revisited the  
139 phenotypes of *GLK* overexpression lines *35S:GLK1*, *35S:GLK2* and the *glk1 glk2* double mutant  
140 (Waters et al., 2009). Compared to Col-0 wild type (WT), *glk1 glk2* exhibited a clear pale green  
141 phenotype, whereas *35S:GLK1* and *35S:GLK2* showed slightly darker green phenotype (**Figure**  
142 **1a**), which were consistent with previous reports (Waters et al., 2009).

143 We next measured the chlorophyll and carotenoid content in *35S:GLK1*, *35S:GLK2* and  
144 *glk1 glk2* lines. As expected, the *glk1 glk2* double mutant had less chlorophylls compared to WT  
145 (**Figure 1b**). A significant increase in total chlorophyll was observed in *35S:GLK1* and  
146 *35S:GLK2* lines (**Figure 1b**). Noticeably, the total carotenoid level showed a similar trend,

147 decreased in the *glk1 glk2* double mutant and increased in the *35S:GLK1* and *35S:GLK2* lines  
148 (**Figure 1c**). The carotenoid level in the *glk1 glk2* double mutant was less than half of that in WT  
149 while *GLK1* and *GLK2* overexpression lines had 20% more, indicating a coordinated alteration  
150 of both carotenoid and chlorophyll biosynthesis.

151 To identify the key pathway genes affected by GLKs, transcript levels of genes in both  
152 the carotenoid and chlorophyll biosynthesis pathways were analyzed. Consistent with the  
153 previous report (Waters et al., 2009), the chlorophyll biosynthesis pathway genes, i.e, *GluTR*  
154 (*glutamyl-tRNA reductase*), *CHLI* (*magnesium chelatase I subunit*), *GUN4* (*GENOMES*  
155 *UNCOUPLED4*), *GUN5* (*magnesium chelatase H subunit*), *CHLM* (*Magnesium protoporphyrin*  
156 *IX methyltransferase*), and *CAO* (*chlorophyll a oxygenase*) were down-regulated in the *glk1 glk2*  
157 double mutant and some were up-regulated in the overexpression lines *35S:GLK1* and *35S:GLK2*  
158 (**Figure 1d**). *PSY* catalyzes the first committed step of carotenoid biosynthesis and is responsible  
159 for the overall carotenoid synthesis capacity in plants (Zhou et al., 2022). *PSY* transcript level  
160 was over 3-fold higher in the *35S:GLK1* and *35S:GLK2* lines and reduced by more than half in  
161 the *glk1 glk2* double mutant compared to WT (**Figure 1d**). *DXS* (deoxy-D-xylulose 5-phosphate  
162 synthase), *PDS* (*phytoene desaturase*), and *LCYB* (*lycopene beta-cyclase*) also displayed altered  
163 expression in these lines (**Figure 1d**). These results suggest a possible role for GLKs in the  
164 transcriptional regulation of carotenoid biosynthesis.

165 Direct regulation of chlorophyll biosynthesis by GLKs has been well-established (Waters  
166 et al., 2009; Tu et al., 2020). Because chlorophyll and carotenoid biosynthesis are tightly co-  
167 regulated, the impact of GLKs on carotenoid biosynthesis can be either a primary effect or an  
168 indirect consequence caused by the altered chlorophyll biosynthesis. To differentiate the two  
169 possibilities, we examined the regulation of carotenoid biosynthesis by GLKs in non-green  
170 tissues.

171 Callus system has been frequently used to examine carotenoid accumulation (Maass et al.,  
172 2009; Yuan et al., 2015; Schaub et al., 2018; Sun et al., 2020). In dark-grown callus, chlorophyll  
173 biosynthesis is inactive and thus carotenoid accumulation can be visualized. We induced calli  
174 from WT, *glk1glk2* double mutant, *35S:GLK1*, and *35S:GLK2* lines and found that the *glk1glk2*  
175 double mutant showed less color while *35S:GLK1* and *35S:GLK2* lines exhibited a more intense  
176 yellow color than WT (**Figure 1e**). Analysis of carotenoid pigments confirmed that the *GLK*  
177 overexpression lines accumulated significantly more carotenoids whereas *glk1glk2* accumulated

178 less compared to WT (**Figure 1f**). Examination of carotenoid biosynthesis pathway gene  
179 expression in these calli also revealed that *PSY* was significantly up-regulated in *GLK*  
180 overexpression lines but down-regulated in the double mutant (**Figure 1g**). Other pathway genes  
181 such as *PDS* and *LCYB* also showed up-regulation in *GLK* overexpression lines and down-  
182 regulation in the double mutant, but to a lesser extent than *PSY* (**Figure 1g**).

183 To further investigate the specific regulation of carotenoid biosynthesis by GLKs,  
184 etiolated seedlings of the WT, *glk1glk2* double mutant, *35S:GLK1*, and *35S:GLK2* lines were  
185 examined. All lines showed yellow cotyledons without green chlorophyll accumulation. While  
186 the etiolated *glk1glk2* double mutant was pale, the overexpression lines exhibited a darker yellow  
187 color than WT (**Figure 1h**). Pigment analysis confirmed that *GLK* overexpression lines  
188 accumulated significantly more and *glk1glk2* significantly less carotenoids than WT (**Figure 1i**)  
189 without detectable chlorophyll accumulation. Moreover, *PSY* expression was significantly up-  
190 regulated in *GLK* overexpression lines and down-regulated in *glk1glk2* (**Figure 1j**).

191 Taken together, these results support the specific regulation of carotenoid biosynthesis by  
192 GLKs in the absence of chlorophyll accumulation in both callus and etiolated seedling systems,  
193 which led us to further explore the regulatory mechanism of carotenoid biosynthesis by the GLK  
194 transcription factors.

195

### 196 **Interaction between GLK and GBF transcription factors**

197 Although GLKs are known to regulate chlorophyll biosynthesis pathway genes (Waters et al.,  
198 2009; Tu et al., 2020), how they associate with the promoters of the pathway genes to activate  
199 their expression remains to be elucidated. GLK1 and GLK2, also named GBF'S PRO-RICH  
200 REGION-INTERACTING FACTOR1 & 2 (GPRI1 & 2), were initially found to interact with the  
201 Pro-rich domain of G-box Binding Factors GBFs by *in vitro* experiments (Tamai et al., 2002).  
202 Thus, we hypothesized that GLKs form regulatory complexes to activate the expression of their  
203 target genes. The search of known and predicted protein–protein interactions with STRING  
204 (Szklarczyk et al., 2019) indicated that both GLK1 and GLK2 can interact with GBF1 (**Figure**  
205 **2a**). Another common interaction partner, the NAC family transcription factor ORE1, was  
206 previously shown to repress the activities of GLKs (Rauf et al., 2013). Because of the strong  
207 self-activation activity of GLKs (Tamai et al., 2002), the interactions between full length GLKs  
208 and GBFs have not been assessed. Moreover, whether they interact *in vivo* is yet to be



209 determined. Since the G-box motif is one of the enriched motifs in the promoters of GLK-  
210 regulated genes (Waters et al., 2009) and is also frequently present in the promoter region of  
211 carotenoid and chlorophyll biosynthetic pathway genes (Toledo-Ortiz et al., 2010; Toledo-Ortiz  
212 et al., 2014; Jin et al., 2021), we postulated that GBFs might be involved in the GLK regulatory  
213 machinery. Therefore, the interactions between GLKs and GBFs were assessed.

214 To examine potential interactions, we carried out a pull-down assay using the full-length  
215 proteins of GLKs and GBFs. GLK1 and GLK2 were fused with a maltose binding protein  
216 (MBP)-tag, while GBF1, 2, and 3 were fused with a glutathione S-transferase (GST)-tag  
217 (**Supplemental Figure S1**). Both GLK1 and GLK2 were captured by GST-tagged GBF proteins  
218 as shown by an immunoblot with MBP antibody (**Figure 2b**). No signal was detected when GLK  
219 proteins were incubated with GST only (**Figure 2b**).

220 To test whether GLKs and GBFs interact with each other *in vivo*, we employed the split  
221 luciferase complementation assay, a convenient technique to detect live protein-protein  
222 interactions in plants (Zhou et al., 2018). The binary vectors (pDEST-nLUC & pDEST-cLUC)  
223 containing coding sequences of N-terminal and C-terminal firefly luciferase (nLUC & cLUC)  
224 were first generated (**Supplemental Figure S2**). The coding sequences of GLK1 and GLK2  
225 were fused to nLUC, and the coding sequences of GBF1, 2, and 3 were fused to cLUC,  
226 respectively. By transient expression of the paired constructs in *Nicotiana benthamiana* and live  
227 imaging of the bioluminescence, we found that both GLK1 and GLK2 interacted with GBF1, 2,  
228 and 3 in plants (**Figure 2c**). BRAS- SINOSTEROID insensitive2 (BIN2), a recently reported  
229 interacting partner of GLKs (Zhang et al., 2021), was used as a positive control and showed  
230 interactions with GLK1 and GLK2 as expected (**Figure 2c**). PIF4 is another G-box binding  
231 transcription factor regulating *PSY* expression (Toledo-Ortiz et al., 2010) and was used as a  
232 control. No interaction was detected between GLKs and PIF4 (**Figure 2c**).

233 A bimolecular fluorescence complementation (BiFC) assay was also performed to further  
234 validate the interactions between GLKs and GBFs *in planta*. Since GBF1 is the dominant  
235 expressed GBF in most tissues (**Supplemental Figure S3**), the interaction between GLKs and  
236 GBF1 was first examined (**Figure 2d**). As expected, all the GLK-GBF pairs showed the  
237 reconstituted fluorescence signal in the nucleus (**Figure 2d & Supplemental Figure S4**). The  
238 PIF4-YFP signal also indicates nuclear localization (**Figure 2d**). In contrast, the GLK1-PIF4 and  
239 GLK2-PIF4 negative controls showed no fluorescence signals (**Figure 2d**). To confirm the



240 nuclear localization of BiFC signal, a cell-permeant nuclear fluorescent stain Hoechst 33342 was  
241 applied to the tissue. The fluorescent signal merged with the BiFC signal, confirming  
242 interactions in nucleus (**Supplemental Figure S5**). These data demonstrate the *in vivo*  
243 interactions between the full-length proteins of GLK and GBF transcription factors, raising the  
244 possibility that GBFs participate in transcriptional regulation by GLKs. Noticeably, condensates  
245 inside the nucleus were frequently observed when GLKs and GBFs interact (**Figure 2d &**  
246 **Supplemental Figure S4 & 5**).

247

### 248 **G-box motif is important for the transcriptional regulation of *PSY* expression**

249 Since *PSY* is the major rate-limiting enzyme in the carotenoid biosynthesis pathway, regulation  
250 of its expression directly affects carotenoid biosynthesis (Zhou et al., 2022). We next  
251 investigated the potential association of these transcription factors to the *PSY* promoter to  
252 activate *PSY* expression and regulate carotenoid biosynthesis. Genome-wide binding profiles of  
253 GBF1, 2, 3 have been recently reported in Arabidopsis (Kurihara et al., 2020) and chromatin  
254 immunoprecipitation combined with next-generation sequencing (ChIP-seq) analysis of GLK1  
255 and GLK2 has also been accomplished  
256 (<https://www.ncbi.nlm.nih.gov/bioproject/?term=PRJNA682315>). By examining the potential  
257 binding of GLK or GBF transcription factors to the *PSY* promoter, we noticed that both GLK and  
258 GBF transcription factors have binding peaks on the *PSY* promoter and that the peak regions  
259 showed significant overlap (**Figure 3a**). Previously, a putative CCAATC motif was proposed as  
260 the binding site of GLKs (Waters et al., 2009). A recent study suggested a similar GLK binding  
261 motif GATTCT, which is the reverse complement of 5/6 bp of the originally defined sequence  
262 (Zhang et al., 2021). However, no CAATC motif was found in the binding peak area of the *PSY*  
263 promoter. Interestingly, two G-box motifs were located in this region (**Figure 3a**), which could  
264 be the binding sites for GBFs.

265 We first analyzed promoter activity by a luciferase reporter assay with different truncated  
266 version of the *PSY* promoter. The 2221 bp (2.2 k) promoter upstream from the start codon (ATG)  
267 of *PSY* included the GLK and GBF binding peak region with G-box motifs, whereas the 2000 bp  
268 (2.0 k) promoter upstream from the ATG did not include this region. Fragments of the *PSY*  
269 promoter were cloned in the binary vector pCAMBIA1390-LUC generated in our previous study  
270 (Sun et al., 2019). Significantly higher activity of the 2.2 k promoter was observed compared to

271 the 2.0 k promoter-driven luciferase (**Figure 3b**), suggesting that the G-box containing region  
272 contributed to the transcriptional activation of the *PSY* expression.

273 To identify the binding sites of GLKs and GBFs on the *PSY* promoter, four probes  
274 covering the peak area were designed (**Supplemental Figure S6**) for electrophoretic mobility  
275 shift assay (EMSA). The two G-box motifs are present in probe 2 and probe 4. No binding was  
276 observed between GLKs and all four probes (**Figure 3c, 3d & Supplemental Figure S7**).  
277 However, significant band shifts were observed when incubating probe 2 and 4 with GBF1,  
278 GBF2, and GBF3 proteins (**Figure 3c & 3d**). To further validate the specific binding of GBFs to  
279 probe 2 and 4, competitive probes without biotin label were added to the reaction. Meanwhile,  
280 the mutant probes (probe 2M and probe 4M) with a mutated G-box motif (CACCGTG to  
281 CATCTTG) were also used for EMSA. Competitors reduced the binding of GBFs to probe 2 and 4  
282 while the mutant probes lost the binding ability (**Figure 3e & 3f**), confirming the binding of  
283 GBFs to the G-box motif.

284 A yeast one-hybrid experiment was also conducted to examine the binding of GBFs to  
285 the G-box motifs in the *PSY* promoter. The probe 2 and 4 fragments as well as the mutated  
286 versions were used as baits. The growth of yeast on selective medium clearly indicated  
287 interactions between GBFs and both probes (**Figure 3g & 3h, Supplemental Figure S8**). No  
288 growth was observed when the G-box motif was mutated (**Figure 3g & 3h**). These protein-DNA  
289 interaction results suggest that although GLKs and GBFs are associated with *PSY* promoters with  
290 overlapping binding peaks, only GBFs have the ability to directly bind to the *PSY* promoter  
291 through the G-box motif.

292

### 293 **Trans-activation of *PSY* by GLKs relies on GBF transcription factors**

294 To investigate whether it is GBFs or GLKs that provide the transcriptional activation to promote  
295 *PSY* gene expression, transcription activity assay was performed using a GAL4-responsive  
296 system in yeast (Friedman et al., 2004). Constructs were designed as shown in **Figure 4a** and the  
297 activity of each transcription factor was measured by quantifying the  $\beta$ -galactosidase activity  
298 (**Figure 4b**). Surprisingly, we found that GBFs did not show any trans-activation activity.  
299 Another G-box binding transcription factor PIF4 that was used as a control did show trans-  
300 activation activity, which is consistent with the previous reports (Zhu et al., 2016; Martínez et al.,  
301 2018). Interestingly, GLK1 and GLK2 showed strong trans-activation activities, more than 3-

302 folds of that of the PIF4 (**Figure 4b**). Taken together, these findings suggest that GLKs trans-  
303 activate *PSY* gene expression through interaction with GBFs, which directly bind to the G-box  
304 motif of the *PSY* promoter region.

305 The trans-activation of the *PSY* promoter by the GLK-GBF regulatory module was  
306 examined *in planta*. The *PSY* promoter-driven luciferase showed strong signal when co-  
307 transformed with GLK1 and GBF1, while no increased signal was observed with GBF1 or GLK1  
308 only compared to empty vector control (**Figure 4c**). To quantify the *in vivo* regulation by the  
309 GLK-GBF regulatory module, a trans-activation assay with dual luciferase reporters of nanLUC  
310 and fireflyLUC (**Supplemental Figure S9**) were introduced. The trans-activation activity was  
311 normalized by the fireflyLUC activity. The promoter of *PSY* showed significantly higher activity  
312 when GBF and GLK were co-expressed (**Figure 4d**).

313 Given the critical function of GBFs in interacting with GLKs and binding to target gene  
314 promoters, we next looked for genetic evidence to verify that GBFs are required for the GLK  
315 trans-activation of carotenoid pathway genes. Since overexpression of *GLK1* and *GLK2* resulted  
316 in a darker green color with more pigment accumulation in leaves (**Fig. 1a-c**) and higher  
317 carotenoid content in callus (**Figure 1f**), we knocked out *GBF1*, *GBF2*, and *GBF3* in *GLK1* and  
318 *GLK2* overexpression background by CRISPR/Cas9 (**Supplemental Figure S10 & 11**) to  
319 examine the phenotype changes in leaf and callus. Decreased carotenoid content was observed in  
320 the *GLK1 gbf1/2/3* or *GLK2 gbf1/2/3* triple knock-out lines as compared to the calli of *GLK1* and  
321 *GLK2* overexpression lines (**Figure 4e**). Instead of dark green leaves in the *GLK1* and *GLK2*  
322 overexpression lines, the *gbf1/2/3* triple knock-out lines in *GLK1* and *GLK2* over-expression  
323 background showed normal or even reduced leaf color comparing to WT (**Figure 4f**). These  
324 results show that knocking-out of *GBF1*, *GBF2*, and *GBF3* reverses the phenotype of *GLK1* and  
325 *GLK2* overexpressors, proving the essential role of GBFs in the GLK-GBF regulatory module  
326 for the control of carotenoid biosynthesis.

327

### 328 **GBFs mediate nuclear condensate formation**

329 In recent years, emerging evidence suggests that the formation of protein-nucleic acid  
330 condensates as concentrated transcriptional complexes in the nucleus plays an important role in  
331 spatiotemporally regulating gene expression in plants (Fang et al., 2019; Xie et al., 2021; Zhu et  
332 al., 2021b). Intriguingly, nuclear condensates were observed in the BiFC assay when GLKs and

333 GBFs interacted (**Figure 2d & Supplemental Figure S5**). Liquid-liquid phase separation (LLPS)  
334 of certain proteins drives the formation of biomolecular condensates as non-membranous  
335 compartments. To analyze which transcription factor triggers a phase separation, the phase  
336 separation property of GLKs and GBFs was predicted by their sequences for the presence of  
337 intrinsically disordered domains prone to undergo phase separation (Paiz et al., 2021; Chu et al.,  
338 2022). GLK1 and GLK2 are not phase separation proteins; however, GBF1, 2, and 3 have large  
339 disordered protein structures which are prone to undergo LLPS (**Figure 5a**). Therefore, we  
340 hypothesized that GBFs mediate the LLPS of GLKs to form nuclear condensates.

341 To examine the observed phenomena, the nuclear localization pattern of each GLK and  
342 GBF protein was first examined. When GBFs or GLKs fused with YFP tag were expressed  
343 individually, nuclear condensates were rarely detected (**Figure 5b, Supplemental Figure S12**),  
344 indicating GBFs and GLKs alone are insufficient to form the nuclear condensates. Noticeably,  
345 nuclear condensates were clearly observed when GBF1 and GLK1 or GLK2 were interacted  
346 (**Figure 5b**). Since GLKs also regulate carotenoid biosynthesis in non-green tissues such as  
347 callus and etiolated seedlings, the assay was also conducted in onion epidermal cell to examine  
348 the interaction in non-green tissue. Similarly, nuclear condensates could be clearly observed  
349 when GLKs and GBFs interacted with each other (**Supplemental Figure S13**).

350 BIN2, which phosphorylates GLKs (Zhang et al., 2021), was confirmed to interact with  
351 GLKs by our luciferase complementation assay (**Figure 2c**). BIN2 and GLK1 interaction also  
352 induced nuclear condensates (**Figure 5b**). Conversely, the NAC family transcription factor  
353 ORE1, which was previously shown to repress the activities of GLKs (Rauf et al., 2013), and  
354 another transcription regulator LSD1 that was recently reported to inhibit the DNA binding  
355 activity of GLK1 (Li et al., 2022), did not form nuclear condensates with GLKs (**Figure 5b**). The  
356 phase separation protein predictions for BIN2, LSD1, and ORE1 suggested that none of them is a  
357 phase separation protein (**Supplemental Figure S14**). The observation of nuclear condensates  
358 when BIN2 and GLK1 interacted may indicate additional factors being responsible for the  
359 condensate formation.

360 To confirm that the GLK-GBF condensates are formed via LLPS, we first tested whether  
361 they have liquid-like properties by performing fluorescence recovery after photobleaching  
362 (FRAP) experiments. The nuclear GLK1 or GLK2 and GBF1 condensate signals from epidermal  
363 cells of *Nicotiana benthamiana* were used for the FRAP assay. After bleaching of the selected

364 region of interest, more than 50% of fluorescent signals within the condensates gradually  
365 recovered in 40 s, indicating a redistribution of these proteins into condensates in the nucleus  
366 (**Figure 5c-e, S. video1 and 2**). GLK1-BIN2 nuclear condensates also showed similar recover  
367 properties (**Figure 5c&f, S. video 3**). These findings suggest that GLK-GBF regulatory modules  
368 as well as GLK-BIN2 are in nuclear condensates.

369 Since GBF1 is a predicted phase separation protein and represents the most abundant  
370 GBF protein in Arabidopsis tissues (**Figure 5a, Supplemental Figure S3**), we tested the  
371 hypothesis that GBF1 mediates the phase separation and condensate formation of the GLK  
372 complex. We first expressed and purified recombinant GST-GBF1 and GLK1-YFP proteins. The  
373 GST tag of GST-GBF1 fusion protein was removed by thrombin cleavage to obtain GBF1  
374 protein. After incubation of GBF1 and GLK1-YFP together, GLK1-YFP droplet formation was  
375 induced and observed by fluorescent signal (**Figure 5g**). When GST tag only and GLK1-YFP  
376 were mixed, no GLK1-YFP droplet formation was observed (**Figure 5g**). This result indicates  
377 that GBF1 is responsible for phase separation of the GLK1-GBF1 complex.

378 Besides the natural tendency of protein to undergo phase separation, the concentration of  
379 biomolecular condensate components is another factor to control the assembly and disassembly  
380 of biomolecular condensates (Banani et al., 2017). Essentially, the formation of the condensed  
381 phase is determined by the concentrations of its components when their solubility limits are  
382 exceeded. Thus, the expression of *GLKs* and *GBFs* in various Arabidopsis tissues, which affects  
383 protein concentration, was examined. Both *GLK1* and *GBF1* expressed highly in rosette leaves,  
384 which peaked during early stages of leaf development (**Figure 5h**), when chloroplast  
385 development including chlorophyll and carotenoid biosynthesis is active. It is likely that the  
386 coupled expression patterns of *GLK1* and *GBF1* enable the phase separated condensate  
387 formation and active GLK-GBF complex function to regulate photosynthetic pigment  
388 biosynthesis at the proper developmental stage.

389  
390 **GLK-GBF regulatory module likely serves as a conserved mechanism underlying GLK**  
391 **targeted photosynthetic pigment synthesis**

392 To investigate whether GLK-GBF regulatory module functions widely in regulating *PSY*  
393 expression, we examined the distribution of G-box motif in promoters of *PSY* genes from several  
394 representative genomes. By analyzing 3000-bp promoter regions (upstream of start codon) of

395 *PSY* genes, we identified a wide distribution of the G-box motif in *PSY* promoters (**Figure 6a**).  
396 The widely distribution of G-box motif in *PSY* promoters implies that the GLK-GBF regulatory  
397 module may serve as a conserved mechanism in regulating carotenoid biosynthesis.

398 By examining *Arabidopsis* (*Arabidopsis thaliana*) co-expression data (<http://atted.jp>),  
399 (Obayashi et al., 2018), we found that both chlorophyll and carotenoid biosynthetic pathway  
400 genes exhibited high co-expression with *GLK1* and *GLK2* levels (**Figure 6b**). GLKs have been  
401 reported to regulate chlorophyll biosynthesis pathway genes including *Glutamyl-tRNA Reductase*  
402 (*GluTR*, or *HEMA1*), *Mg-Chelatase H subunit* (*CHLH/GUN5*), *GENOMES UNCOUPLED 4*  
403 (*GUN4*), and *Chlorophyllide a Oxygenase* (*CAO*) (Waters et al., 2009). Those genes showed  
404 high correlations with *GLK1* and *GLK2* expression (**Figure 6b**). Similarly, *PSY* as well as other  
405 carotenoid biosynthesis pathway genes also showed high correlation with *GLK1* and *GLK2*  
406 (**Figure 6b**). Therefore, it is likely that the regulation of chlorophyll and carotenoid biosynthesis  
407 by GLKs shares a common mechanism.

408 A recent ChIP-seq analysis of *GLK1* and *GLK2* uncovered the potential target sites of  
409 GLKs in *Arabidopsis* (<https://www.ncbi.nlm.nih.gov/bioproject/?term=PRJNA682315>). We  
410 examined these data sets and compared them with the genome-wide binding sites of GBF1, 2, 3  
411 in *Arabidopsis* (Kurihara et al., 2020). We found that more than two-thirds of the *GLK1* or  
412 *GLK2* targets are also the targets of either GBF1, GBF2, or GBF3 (**Figure 6c, Supplemental**  
413 **Table S1**). A total of 3918 genes were identified as common target genes of *GLK1*, *GLK2*, and  
414 GBFs (**Figure 6c**). In addition to *PSY* for carotenoid biosynthesis, *CAO* and *GUN5*, two critical  
415 genes for chlorophyll biosynthesis, were also present among the common target genes. Similarly,  
416 the G-box motif was present in the GLK and GBF overlapping binding peaks of *GUN5* and *CAO*  
417 promoters (**Figure 6d&e**). Since their expression is greatly altered in *GLK* overexpression and  
418 *glk1glk2* lines (**Figure 1d**), it is likely that the GLK-GBF regulatory machinery also functions in  
419 regulating these genes to regulate chlorophyll biosynthesis.

420

## 421 **DISCUSSION**

422 GLKs are widely recognized with a conserved function in regulating chloroplast development,  
423 particularly regulating the expression of photosynthetic-related nuclear genes including those for  
424 chlorophyll biosynthesis (Rossini et al., 2001; Fitter et al., 2002; Waters et al., 2009; Powell et  
425 al., 2012; Nguyen et al., 2014; Yeh et al., 2022). However, whether GLKs directly regulate



426 carotenoid biosynthesis and how GLKs transcriptionally activate their targeted genes are less  
427 understood. Here, we provide evidence that GLKs are the major transcriptional regulators of *PSY*  
428 for carotenoid biosynthesis, therefore the master regulators in orchestrating both chlorophyll and  
429 carotenoid pigment production for photosynthesis in chloroplasts. GLKs physically interact and  
430 form a regulatory module with GBFs, which serve as liquid-liquid phase separation proteins to  
431 induce nuclear condensates of the GLK-GBF transcription complex for function, unravelling a  
432 novel regulatory mechanism underlying the GLK regulated transcriptional activation of  
433 photosynthetic-related nuclear genes.

434

### 435 **GLKs function as the major transcriptional regulators of *PSY* for carotenoid biosynthesis**

436 *PSY* is the main rate-limiting enzyme for carotenoid biosynthesis and its expression is highly and  
437 multifacetedly regulated (Zhou et al., 2022). Transcriptional regulation is central to modulate  
438 *PSY* activity for carotenogenesis (Ruiz-Sola and Rodríguez-Concepción, 2012; Sun and Li, 2020;  
439 Sun et al., 2022a). A number of transcription factors have been reported to directly bind to *PSY*  
440 promoters in various plants (Xiong et al., 2019; Wu et al., 2020; Lu et al., 2021). Only a few  
441 appear to exert a conserved function among plant species. PIFs and HY5 were found to form a  
442 dynamic repression-activation module. They antagonistically bind to the same G-box motif in  
443 the *PSY* promoter to suppress and activate carotenoid biosynthesis during de-etiolation (Toledo-  
444 Ortiz et al., 2010; Toledo-Ortiz et al., 2014; Bou-Torrent et al., 2015).

445 In photosynthetic tissues, GLK transcription factors are the master regulator of  
446 chloroplast development and the top regulators of chlorophyll biosynthesis (Tu et al., 2020).  
447 Noticeably, revisiting of *GLK* overexpressors and *glk1 glk2* mutant showed that carotenoid levels  
448 were also correlated with *GLK* expression in *Arabidopsis* leaves (**Figure 1**). Since the  
449 chlorophyll and carotenoid biosyntheses in green leaves are highly coordinated, the alternation of  
450 one pigment content often affects another. Therefore, the change of carotenoid content in leaves  
451 could be the indirect effect of chlorophyll biosynthesis rather than direct regulation. By using  
452 non-green tissues including etiolated seedling and callus systems, we were able to distinguish the  
453 direct transcriptional regulation and the indirect effect by the change of chlorophyll biosynthesis,  
454 and therefore document the genuine role of GLKs in direct regulation of the expression of  
455 carotenoid biosynthetic genes, particularly *PSY*, for carotenoid synthesis.

456



## 457 **Molecular mechanism of the transcriptional regulation by GLKs**

458 GLKs are the key regulators of chloroplast development. GLKs as a small family of conserved  
459 transcription factors in plants regulate the expression of photosynthesis-related genes as their  
460 primary targets (Fitter et al., 2002; Yasumura et al., 2005; Waters et al., 2009). In recent years,  
461 the functions of GLK transcription factors are expanded to response to many plant physiological  
462 processes, including leaf senescence, plant defense, and stress responses (Murmu et al., 2014;  
463 Martín et al., 2016; Ni et al., 2017; Zubo et al., 2018; Ahmad et al., 2019; Zhao et al., 2021; Yeh  
464 et al., 2022). However, the transcriptional regulatory mechanism is not well defined.

465 Previously, a highly represented CCAATC motif in promoters of the GLK-regulated  
466 genes was proposed as the potential binding site of GLKs (Waters et al., 2009). While some  
467 reports support this interaction (Ahmad et al., 2019; Zhang et al., 2021), this motif is not  
468 highlighted as a target site of GLKs in a recent ChIP-seq analysis of GLK1 and GLK2 in maize  
469 (Tu et al., 2020) and in Arabidopsis  
470 (<https://www.ncbi.nlm.nih.gov/bioproject/?term=PRJNA682315>). We hypothesized that GLKs  
471 may interact with transcriptional partners to bind specific motifs in activating the expression of  
472 diverse subsets of target genes.

473 GBFs are known to bind to G-boxes in a context-specific manner to give diversity and  
474 specificity in transcriptional regulation of plant gene expression (Menkens et al., 1995). G-box  
475 motif is frequently found in promoter regions of carotenoid biosynthesis pathway genes (Toledo-  
476 Ortiz et al., 2010; Toledo-Ortiz et al., 2014; Jin et al., 2021). By analyzing the genome-wide  
477 binding of GBF1, 2, 3 and targets of GLKs in Arabidopsis (Kurihara et al., 2020; Shen, 2021)  
478 (<https://www.ncbi.nlm.nih.gov/bioproject/?term=PRJNA682315>), protein-protein interaction,  
479 and further supported by the genetic evidence, we found that GLKs transcriptionally activated  
480 *PSY* expression through forming the GLK-GBF regulatory module, in which GLKs rely on the  
481 direct association of GBFs to the G-box motif in the *PSY* promoter. Regulatory complexes of  
482 physiological processes are widespread in plants including circadian rhythm (Nusinow et al.,  
483 2011), photomorphogenesis (Chen et al., 2013), immune response (Ding et al., 2018), and  
484 metabolism (Gonzalez et al., 2008). The transcriptional regulatory complexes enable efficient  
485 and delicately adjustment of the spatiotemporal gene expression, which is also applicable to the  
486 GLK-GBF complex in the regulation of photosynthetic pigment biosynthesis. Moreover, our

487 study revealed the presence of LLPS in the transcriptional regulatory complex, an emerging  
488 fundamental mechanism underlying spatiotemporal transcriptional regulation in the nucleus.

489

### 490 **The liquid-liquid phase separation of GLK-GBF complex**

491 Increasing evidence suggests a critical role of formation of protein-nucleic acid condensates as  
492 the concentrated transcriptional complexes in the nucleus to regulate gene expression in plants  
493 (Fang et al., 2019; Xie et al., 2021; Zhu et al., 2021b). Proteins with intrinsically disordered  
494 regions have the potential to form membrane-less phase-separated condensates (Alberti et al.,  
495 2019). When GLKs and GBFs interacted, nuclear condensates could be clearly observed (**Figure**  
496 **5**). While the interactions of GLKs and BIN2, a positive regulator of GLKs (Zhang et al., 2021),  
497 also formed the nuclear condensates (**Figure 5a**), ORE1 that represses the activities of GLKs  
498 (Rauf et al., 2013) and LSD1 that inhibits the DNA binding activity of GLK1 (Li et al., 2022)  
499 showed no condensate formation when interacted with GLKs (**Figure 5a**), illustrating that only  
500 active form of GLKs creates nuclear condensates.

501 The regulatory functions of LLPS processes have been discovered recently in plants  
502 (Emenecker et al., 2021; Kim et al., 2021). Although hundreds of proteins in Arabidopsis have  
503 the potential to undergo LLPS (Chakrabortee et al., 2016), only a limited number have been  
504 shown to transcriptionally regulate major physiological processes in plants (Fang et al., 2019;  
505 Xie et al., 2021; Zhu et al., 2021b). We show here that GBFs mediate LLPS with GLKs to form  
506 nuclear condensates and that GLK-GBF regulatory module in the phase-separated condensates  
507 represents an attractive strategy to mediate carotenoid biosynthesis. A working mode of GLK-  
508 GBF complex to regulate the pigment biosynthesis process is proposed (**Figure 6f**). The intrinsic  
509 phase separation property of GBFs is essential to induce phase separation condensate formation  
510 while the fluctuation of both GLK and GBF protein concentrations during plant development  
511 likely enables a dynamic control of this nuclear condensate assembly. This finding supports the  
512 broad existence of phase separating transcriptional complexes in plants.

513

### 514 **GLKs are the master regulators of photosynthetic pigment synthesis**

515 The synthesis of photosynthetic pigments chlorophylls and carotenoids is coordinately regulated  
516 for chloroplast development. PIFs and HY5 have been shown to coordinately regulate both  
517 photosynthetic pigment synthesis via directly binding to the G-box motifs in promoters of genes

518 such as *protochlorophyllide oxidoreductase (POR)* and *PSY* antagonistically during de-etiolation  
519 (Huq et al., 2004; Moon et al., 2008; Toledo-Ortiz et al., 2010; Toledo-Ortiz et al., 2014; Bou-  
520 Torrent et al., 2015). GLKs are known as the top regulators of chlorophyll biosynthesis in leaf  
521 tissue (Waters et al., 2009; Tu et al., 2020). Here we established GLKs also directly regulate *PSY*  
522 expression for carotenoid biosynthesis via the GLK-GBF regulatory module. Considering the  
523 high frequency of G-box motif in the promoter regions of carotenoid and chlorophyll  
524 biosynthesis pathway genes (Toledo-Ortiz et al., 2010; Toledo-Ortiz et al., 2014; Jin et al., 2021),  
525 it is likely that GLK-GBF transcriptional complexes coordinate both carotenoid and chlorophyll  
526 biosynthesis through the direct regulation of G-box containing genes from those pathways. These  
527 findings expand the current understanding of the GLK functions and uncover GLKs as key  
528 regulators to orchestrate photosynthetic pigment synthesis. Moreover, since G-box motif is one  
529 of the high frequency motifs in GLK target genes (Waters et al., 2009), the discovered regulatory  
530 machinery unravels the transcriptional regulatory mechanism of GLKs and provides a new  
531 regulatory module of chloroplast development.

532

## 533 **METHODS**

### 534 **Plant materials and growth conditions**

535 All the mutants and transgenic lines used in this study were in Columbia (Col-0) background.  
536 The generations of *35S:GLK1*, *35S:GLK2*, and *glk1 glk2* double mutant were described  
537 previously (Waters et al., 2009). To generate *gbf1/2/3* CRISPR-Cas9 knock-out lines, two target  
538 sites on each gene were designed by the online tool kit <http://skl.scau.edu.cn/home/> (Xie et al.,  
539 2017) and assembled into the pHEE401E-mCherry vector (Yu and Zhao, 2019). The construct  
540 was transferred into the *Agrobacterium tumefaciens* strain GV3101 by electroporation and  
541 transformed into Arabidopsis *35S:GLK1* and *35S:GLK2* plants using the floral dipping method.  
542 The T1 seeds were first screened by the fluorescent signal of mCherry marker. The T2 edited  
543 plants were confirmed by sequencing of each gene (**Supplemental Figure S10**) and the gene  
544 expression levels of *GLK1* and *GLK2* were confirmed by real-time PCR (**Supplemental Figure**  
545 **S11**). Arabidopsis plants along with *Nicotiana benthamiana* were grown in a controlled growth  
546 chamber at 23 °C under a 14 h light/10 h dark cycle.

547 To generate non-green tissues, both etiolated seedlings and calli were induced. For the  
548 etiolated seedlings, seeds were first surface sterilized with 70% ethanol, followed by washing 5

549 min for three times. The seeds were then grown on 1/2 Murashige and Skoog (MS) agar plates  
550 and stratified at 4°C in the dark for 3 d and then germinated in the dark at 22°C for 4 d. The SDC  
551 callus induction was performed as described previously (Yuan et al., 2015). Samples collected  
552 from different tissues (leaves, etiolated seedlings, and calli) were either used immediately or  
553 frozen in liquid nitrogen and stored at -80°C until further use.

554

### 555 **Nucleic acid extraction, reverse transcription and gene expression quantification**

556 Genomic DNA was extracted from leaves using the cetyltrimethylammonium bromide (CTAB)  
557 method (Sun et al., 2019). For gene expression analysis, total RNA was isolated using the Trizol  
558 reagent (Invitrogen), and cDNA was synthesized with a PrimeScript cDNA Synthesis Kit  
559 (TaKaRa). Gene expression levels were quantified using gene-specific primers (**Supplemental**  
560 **Table S2**) with SYBR Green Master Mix (Bio-Rad) on CFX384 Touch Real Time PCR  
561 Detection System (Bio-Rad) as detailed previously (Sun et al., 2019). The melt curves were  
562 assessed after each run to confirm single and specific amplification products. The expression  
563 values were calculated according to the comparative CT method (Sun et al., 2019). For each  
564 sample, at least three biological replicates were analyzed. Each duplicate includes leaves from 5  
565 individual plants. *ACTIN8* and *UBQ10* were used as reference genes for normalizing gene  
566 expression.

567

### 568 **Pigment extraction and quantification**

569 Chlorophyll and carotenoid contents were determined according to Sun et al. (Sun et al., 2022c).  
570 Briefly, the plant tissues were ground into fine powder in liquid nitrogen and 50 mg samples  
571 were mixed in 400 µl of 80% acetone. After acetone extraction, 200 µl ethyl acetate were added  
572 to each tube for further extraction, followed by adding 200 µl water. The tubes were vortexed  
573 and centrifuged at 12,000 g for 10 min. The upper phase was transferred to a new tube and  
574 evaporated to dryness. The dried sample was resuspended in 100 µl ethyl acetate, analyzed on  
575 Acquity UPC<sup>2</sup> HSS C18 SB 1.8 mm column (3.0 x 100 mm) using the Waters UPC<sup>2</sup> system, and  
576 quantified as described previously (Yazdani et al., 2019).

577

### 578 **Protein-protein interaction assays**

579 For the luciferase complementation assay, the pDEST-nLUC and pDEST-cLUC constructs were  
580 first generated (**Supplemental Table S2**). The coding sequence of nLUC (aa 1-416) and cLUC  
581 (aa 398-550) were amplified from pSP-LUC+NF (Promega) and inserted between ApaI and XbaI  
582 in pSAT1A-cYFP-N1 (ABRC, stock# CD3-1064) and pSAT6A-cYFP-N1 (ABRC, stock# CD3-  
583 1098), respectively. To make the constructs compatible for Gateway cloning, the attR1-CmR-  
584 ccdB-attR2 sequence was amplified and inserted between BglII and ApaI sites of each construct.  
585 Finally, the nLUC and cLUC vectors were digested by AscI (for pSAT1A) and PI-PspI (for  
586 pSAT6A) and inserted into pPZP-BAR-RCS2 (ABRC, stock# CD3-1057) to generate the  
587 Gateway-compatible binary vectors pDEST-nLUC and pDEST-cLUC. *GLKs* and *GBFs* were  
588 cloned to pDEST-nLUC and pDEST-cLUC, respectively. The constructs were transformed into  
589 the *Agrobacterium tumefaciens* strain GV3101 by electroporation. *Nicotiana benthamiana* leaves  
590 were then infiltrated as described (Sun et al., 2019). Briefly, *Agrobacterium* cells were collected  
591 by centrifugation at 8,000 g for 15 min and then resuspended in infiltration media (50 mM MES,  
592 pH 5.6, 0.5% glucose, 2 mM NaPO<sub>4</sub>, 100 μM acetosyringone) to a concentration of OD<sub>600nm</sub>=0.1.  
593 The leaves were detached two-days after infiltration and sprayed with 0.1 mg/ml luciferin 30 min  
594 before imaging. The bioluminescent signals were detected and documented by the ChemiDOC  
595 MP system (Bio-rad) using the chemiluminescent channel.

596 The bimolecular fluorescence complementation (BiFC) assay was performed as described  
597 previously (Sun et al., 2022b). The Gateway-compatible pSITE binary vectors pSITE-nEYFP-N1  
598 (ABRC stock# CD3-1650) and pSITE-cEYFP-N1 (ABRC stock# CD3-1651) were used for the  
599 cloning of genes of interest. The coding sequences without stop codon of *GLKs* were Gateway  
600 cloned to pSITE-nEYFP-N1 to make GLK1-nY and GLK2-nY. The coding sequences without  
601 stop codon of *GBFs* were Gateway cloned to the pSITE-cEYFP-N1 vector to make GBF1-cY,  
602 GBF2-cY, and GBF3-cY. The PIF4-cY construct was also generated to serve as a control. For  
603 the subcellular localization, the Gateway-compatible binary pGWB541 vector was used to  
604 generate YFP-fusion protein (Nakagawa et al., 2007). The constructs were transformed into the  
605 *Agrobacterium tumefaciens* strain GV3101 by electroporation, and *Nicotiana benthamiana*  
606 leaves were then infiltrated. The leaves were detached two-days after infiltration and the  
607 fluorescent protein signals were observed under Leica SP5 laser confocal microscope. For onion  
608 epidermal cell transformation, the *Agrobacterium* cells were resuspended in the infiltration  
609 media and injected to the adaxial epidermis following the protocol by Xu et al. (Xu et al., 2014).

610 After 72 hrs, the epidermal layers were peeled off for microscopy analysis. For nuclei stain,  
611 Hoechst 33342 (5 µg/ml) were applied to the tissue 10 min before examine under laser confocal  
612 microscope. The YFP fluorescent signals were detected between 520 nm and 560 nm with the  
613 excitation wavelength at 514 nm.

614 Fluorescence Recovery After Photo bleaching (FRAP) analysis was performed following  
615 the step-by-step guide in FRAP wizard of Leica LAS-AF software on Leica SP5 laser-scanning  
616 confocal microscope (Leica Microsystems Exton, PA USA). The laser power at 514 nm was set  
617 to 100% for the bleaching of YFP signal in the region-of-interest (ROI). The first 5 frames  
618 before bleaching were captured as pre-bleach and used for signal normalization. The time course  
619 of 40 sec after photo bleaching was taken to measure the recovery of fluorescence in ROI. The  
620 collected data were normalized using FRAP wizard. For each ROI, data represent normalized  
621 intensity of 5 condensates. At least 5 independent nuclei were analyzed for each FRAP assay.

622 The pull-down assay was performed as previously described (Sun et al., 2019; Sun et al.,  
623 2020). The *GBF1*, *GBF2*, and *GBF3* full-length ORFs were subcloned in pGEX-4T1 (GE  
624 Healthcare) for prokaryotic expression. The full-length ORFs of *GLK1* and *GLK2* were  
625 subcloned into pMAL-c5x (NEB) for prokaryotic expression. After transformation into *E. coli*  
626 BL21(DE3)pLysS (Novagen), the recombinant protein induction was induced with 0.5 mM  
627 IPTG at 25 °C overnight. The bacteria cells were harvested and lysed in the 1X BugBuster cell  
628 lysis buffer (Millipore). RQ1 DNase (Promega) was added in the lysis buffer. For the  
629 purification of GLK1-MBP and GLK2-MBP fusion protein, the lysate was loaded onto amylose  
630 column MBPTrap HP (GE Healthcare, #28-9187-78) prewashed with 5 ml Column Buffer (CB).  
631 The column was then washed with 12 ml CB. The MBP-fusion proteins were finally eluted with  
632 CB containing 10 mM maltose. The recombinant proteins GST-GBF1, GST-GBF2, and GST-  
633 GBF3 were purified from 4 ml culture and immobilized on MagneGST Glutathione particles  
634 (Promega). Briefly, the total protein lysate was incubated with 20 µl MagneGST glutathione  
635 particles at room temperature for 30 min. The particles were captured by magnetic stand and  
636 washed with 400 µl binding/wash buffer containing 4.2 mM Na<sub>2</sub>HPO<sub>4</sub>, 2 mM KH<sub>2</sub>PO<sub>4</sub>, 140 mM  
637 NaCl, and 10 mM KCl, pH 7.2 for three times. The immobilized GST-GBF1, GST-GBF2, and  
638 GST-GBF3 proteins were resuspended in 200 µl binding/wash buffer and divided in two tubes.  
639 The purified GLK1-MBP and GLK2-MBP proteins were added to each tube and incubated at  
640 4°C for 1 h. After the incubation, the particles were washed with 400 µl binding/wash buffer



641 containing 0.1% NP-40 for at least 4 times. After the final wash, the particles were captured by  
642 magnetic stand and proteins captured by the particles were separated by SDS-PAGE and  
643 examined by immunoblotting using MBP antibody (NEB, #E8032S). For the immunoblot, the  
644 MBP antibody was diluted at 1:2000 in blocking buffer (TBST with 5% non-fat milk), the  
645 second antibody goat anti-mouse IgG-HRP conjugate (Bio-Rad, #1706516) was diluted at  
646 1:10000. For the signal detection, WesternBright ECL kit was used to detect the  
647 chemiluminescent signals (LPS Cat# K-12045-D20) and ChemiDoc MP system (Bio-rad) was  
648 used to capture the image.

649

### 650 **Genome-wide transcription factor binding site analysis**

651 The GBF1, GBF2, GBF3 genome-wide binding site sequencing data in Arabidopsis was reported  
652 by Kurihara et al.(Kurihara et al., 2020). The ChIP-seq of GLK1 and GLK2 in Arabidopsis was  
653 obtained from <https://www.ncbi.nlm.nih.gov/bioproject/?term=PRJNA682315>. Duplicated read  
654 pairs, defined as having identical bases at positions of 10–90 in both left and right reads, were  
655 collapsed into unique read pairs. The non-redundant reads were processed to remove adaptor and  
656 low-quality sequence using Trimmomatic (Bolger et al., 2014). The cleaned reads were aligned  
657 to the Arabidopsis genome using bowtie2(Langmead and Salzberg, 2012) with end-to-end mode,  
658 and the binding peaks were identified using MACS2(Zhang et al., 2008) with parameters -f  
659 BAMPE -g 1.0e8. To identify the target genes of each TF, the binding peaks were compared  
660 with the gene loci. The genes with binding peaks located in upstream promoter regions or  
661 potential downstream regulatory regions (3 kb upstream of start codon or 3 kb downstream of  
662 stop codon) or within annotated gene bodies were considered as target genes. The target gene  
663 lists were analyzed by the Bio-Analytic Resource Venn Selector Tool to generate the Venn  
664 Diagram (<http://http://bar.utoronto.ca/>). The binding peaks were visualized and analyzed by  
665 Integrative Genomic Viewer (IGV) (Robinson et al., 2011).

666

### 667 **Promoter activity assay**

668 The promoter-luciferase reporter construct pCAMBIA1390-Luc<sup>+</sup> was generated in our previous  
669 study (Sun et al., 2019). Different lengths of the upstream flanking region from the start codon of  
670 *PSY* were inserted to drive the expression of Luc<sup>+</sup> as a reporter. Each of the constructs was  
671 transferred into the *Agrobacterium tumefaciens* strain GV3101 by electroporation and then



672 infiltrated into *Nicotiana benthamiana* leaves. Before infiltration, the concentration of each  
673 *Agrobacterium* culture was measured and adjusted to  $OD_{600nm}=0.1$ . Leaves from uniformly  
674 grown plants at the same developmental stage were transformed. After infiltration, the plants  
675 were kept in a growth chamber under a 16-h light/8-h dark light cycle for 2 d. Leaves were then  
676 detached, sprayed with 0.1 mg/ml luciferin solution, and documented by the ChemiDoc MP  
677 system (Bio-rad). The intensity of the bioluminescent signal was analyzed using ImageJ software  
678 (Schneider et al., 2012). For each construct, three replicated injections were analyzed.

679

### 680 **EMSA assay**

681 For EMSA, a LightShift Chemiluminescent EMSA kit (Thermo Scientific) was used following  
682 the manufacturer's instructions. The GST-GBF and MBP-GLK fusion proteins were purified as  
683 described above. The prokaryotic expression of GST protein from the empty pGEX-4T1 vector  
684 was used as a control. The 5' biotin-labeled single strand probe 1, probe 2, probe 3, and probe 4  
685 oligos were synthesized (idtDNA) and annealed to generate double strand DNA probes.  
686 Competitors were made by annealing unlabeled oligos. The mutant probes were synthesized by  
687 annealing the respective oligos with mutations. The binding reactions were resolved by  
688 polyacrylamide gel electrophoresis (PAGE) in 0.5x TBE buffer. The gel was then transferred to  
689 Hybond N+ (Amersham) nylon membrane and blotted with HRP-Conjugated Streptavidin  
690 (Thermo Scientific) with a dilution factor 1:2000. The chemiluminescent signals were developed  
691 by WesternBright ECL kit (LPS Cat# K-12045-D20) and documented on the ChemiDoc MP  
692 system (Bio-rad).

693

### 694 **Yeast one-hybrid analysis**

695 The yeast one-hybrid analysis was performed following the protocol by Zhou et al. (Zhou et al.,  
696 2015a). For the bait vector construction, both strand oligos of the probes were synthesized by  
697 idtDNA (**Supplemental Table S2**), annealed and inserted between *EcoRI* and *SpeI* of pHIS2.1  
698 vector (Clontech). The GLK and GBF CDS were cloned to pGAD-T7 to generate AD fusion.  
699 The plasmids were transformed into *Saccharomyces cerevisiae* Y187 and the colonies were  
700 selected on -Trp/-Leu double drop-out plates. To inhibit the background expression of *HIS3*, the  
701 concentration of 3-Amino-1,2,4-triazole (3-AT) was determined by the inhibition of growth of  
702 pHIS2.1 bait vector+pGAD-T7 empty vector combination on -Trp/-Leu/-His triple drop-out

703 plates at a series concentration of 3-AT (1 mM, 5 mM, 10 mM, 20 mM, and 40 mM). The  
704 interaction was displayed by the growth of colonies by dotting 5  $\mu$ l liquid culture on -Trp/-Leu/-  
705 His triple drop-out plates. The liquid culture was series-diluted in ddH<sub>2</sub>O while the initial  
706 concentration was OD<sub>600</sub> = 0.1.

707

### 708 **Trans-activation activity measurement**

709 To measure the transactivation capability of GBFs and GLKs, yeast strain YRG-2 with LacZ  
710 reporter was used. In brief, the full-length *GLK1* and *GLK2* ORFs were fused to the DBD of  
711 pDEST32 to create pDEST32-GLK1 and pDEST32-GLK2. The *GBF* and *PIF4* constructs,  
712 pDEST-DB-GBF1, pDEST-DB-GBF2, pDEST-DB-GBF3, and pDEST-DB-PIF4 were ordered  
713 from ABRC. Each construct as well as the empty pDEST32 vector was transformed into YRG-2  
714 separately and selected with dropout medium. Before collecting 1.5 ml of the overnight culture  
715 in the selective medium, OD<sub>600nm</sub> was recorded. After washing and resuspending in 100  $\mu$ l Z-  
716 buffer (60 mM Na<sub>2</sub>HPO<sub>4</sub>, 40 mM NaH<sub>2</sub>PO<sub>4</sub>, 10 mM KCl, 1 mM MgSO<sub>4</sub>), the yeast cells were  
717 lysed with four thaw (37 °C water bath) and freeze (liquid nitrogen) cycles. To measure  $\beta$ -  
718 galactosidase activity, 700  $\mu$ l Z-Buffer with 50 mM 2-mercaptoethanol and 160  $\mu$ l 4 mg/ml fresh  
719 prepared O-nitrophenyl- $\beta$ -D-galactopyranoside (ONPG) buffer were added to each tube. The  
720 time was recorded until buffers developed yellow color and 400  $\mu$ l of 1M Na<sub>2</sub>CO<sub>3</sub> was added to  
721 stop the reaction. The trans-activation activity (in Miller unit) was calculated by OD<sub>420nm</sub> after  
722 normalization with the optical density of the yeast culture and the reaction time.

723

### 724 **Dual Reporter Assay**

725 The pDual construct as shown in **Supplemental Figure S9a** was designed for the dual reporter  
726 assay. The UBQ10 promoter and firefly luciferase (FLUC) sequences were amplified and  
727 inserted into pGWB401-nanoLUC (Addgene) as a reference. The attR1-ccdB-CmR-attR2  
728 cassette was inserted beyond nanoLUC sequence to enables the gateway cloning of the promoter  
729 of interest. While UBQ10 promoter-driven firefly luciferase provides a stable reference, the  
730 nanoLUC reporter enables bright bioluminescence for quantification. After co-transformation of  
731 pDual reporter construct and effector constructs by Agrobacteria-mediated transient expression  
732 into *Nicotiana benthamiana* leaves, the total proteins were extracted by 500  $\mu$ l protein isolation  
733 buffer (25 mM Tris-HCl, pH 7.5, 5 mM EDTA, 1% Triton X-100, 10% glycerol, 2 mM DTT).

734 The protein extracts were divided into equal volume (100 ul) and added to separate 96-well  
735 plates, 100 ul assay buffer (25 mM Tris-HCl, pH 7.5, 5 mM EDTA, 25 mM MgSO<sub>4</sub>, 2 mM ATP,  
736 2 mM DTT) containing 1 mM luciferin or coelenterazine was added separately to visualize  
737 firefly luciferase (FLUC) or nanoLUC by ChemiDOC MP imaging system. The trans-activation  
738 activity was normalized by the fireflyLUC activity. For the quantification, the captured image  
739 (**Supplemental Figure S9b**) was inverted to grayscale and the intensity was quantified by the  
740 measurement of grey value of each well selected as ROI by ImageJ (Schneider et al., 2012). For  
741 each transformation, three replicate *Nicotiana benthamiana* leaves were measured.

742

### 743 **Liquid-liquid phase separation analysis *in vitro***

744 The expression of GST-GBF1 was described before. For the thrombin cleavage, the captured  
745 GST-GBF1 fusion protein on MagneGST particles were incubated in 400 µl binding/wash buffer  
746 with 10 units of thrombin for 6 hrs at room temperature. The supernatant was collected and  
747 dialyzed against low salt buffer (40 mM Tris-HCl, pH 7.5, 50 mM NaCl, 10% glycerol). For the  
748 expression of GLK1-YFP-His<sub>6</sub> fusion protein, the GLK1 and YFP coding sequences were cloned  
749 to pET32a vector by Gibson assembly (NEB). The construct was transformed into *Escherichia*  
750 *coli* BL21(DE3)pLysS cells. The cell culture was grown at 37 °C and the protein expression was  
751 induced by the addition of 0.5 mM isopropyl β-D-1-thiogalactopyranoside (IPTG) when OD<sub>600nm</sub>  
752 of the culture reaches 0.4. The culture was incubated overnight at 22 °C. Cells were collected  
753 and lysate in BugBuster (EMDMillipore) with 5 ul RQ1 DNase (Promega). The supernatant was  
754 flowed through a column packed with Ni-NTA (QIAGEN). After washing in washing buffer (40  
755 mM Tris-HCl pH 8.0, 500 mM NaCl and 40 mM imidazole), proteins were eluted with elution  
756 buffer (40 mM Tris-HCl pH 8.0, 500 mM NaCl and 500 mM imidazole). The eluted protein was  
757 dialyzed against low salt buffer (40 mM Tris-HCl, pH 7.5, 50 mM NaCl, 10% glycerol) over  
758 night at 4 °C. For the *in vitro* phase separation, 5 uM of each protein were mixed and incubated  
759 for 1 hr at room temperature. The droplets were observed by laser confocal microscopy. The  
760 YFP fluorescent signals were detected between 520 nm and 560 nm with the excitation  
761 wavelength at 514 nm.

762

### 763 **Supplemental Data**

764 **Supplemental Table S1.** ChIP-seq target gene list

765 **Supplemental Table S2.** Primers used in this study  
766 **Supplemental Figure S1.** SDS-PAGE analysis of prokaryotic expressed GBF and GLK fusion  
767 proteins  
768 **Supplemental Figure S2.** The binary constructs generated for luciferase complementation assay  
769 **Supplemental Figure S3.** Expression heatmap of *GBFs* at different developmental stages  
770 **Supplemental Figure S4.** BiFC assay between GLKs and other GBFs  
771 **Supplemental Figure S5.** Confirming the localization of GLK-GBF interaction by nuclei  
772 staining  
773 **Supplemental Figure S6.** Probe design of the ChIP-peak region in the PSY promoter  
774 **Supplemental Figure S7.** Electrophoretic mobility shift assay  
775 **Supplemental Figure S8.** Negative controls of yeast one-hybrid assay  
776 **Supplemental Figure S9.** Dual reporter assay for the quantification of trans-activation  
777 **Supplemental Figure S10.** GBF knock-out mutant lines by CRISPR-Cas9  
778 **Supplemental Figure S11.** Relative expression of GLK1 and GLK2 quantified by real-time  
779 PCR  
780 **Supplemental Figure S12.** Nuclear localization patterns of GBF1, GLK1, and GLK2  
781 **Supplemental Figure S13.** BiFC experiment with onion epidermal cell transformation  
782 **Supplemental Figure S14.** Prediction of protein phase separation property

783

#### 784 **Accession Numbers**

785 NCBI BioProject accession of GLK1 and GLK2 ChIP-seq: PRJNA682315  
786 (<https://www.ncbi.nlm.nih.gov/bioproject/?term=PRJNA682315>); NCBI BioProject accession of  
787 genome-wide identification of GBF1, GBF2, and GBF3 binding sites: PRJNA610701 (Kurihara  
788 et al., 2020). Gene accession numbers: GLK1, AT2G20570; GLK2, AT5G44190; GBF1,  
789 AT4G36730; GBF2, AT4G01120; GBF3, AT2G46270; PIF4, AT2G43010; BIN2, AT4G18710;  
790 ORE1, AT5G39610; LSD1, AT4G20380.

791

#### 792 **Acknowledgements**

793 We are extremely grateful to Prof. Jane Langdale (University of Oxford) for her careful reading  
794 and valuable suggestions to improve this paper. This work was supported by Agriculture and  
795 Food Research Initiative competitive award grant no. 2019-67013-29162 (to LL) and 2021-

796 67013-33841 (to LL and TS) from the USDA National Institute of Food and Agriculture, and  
797 USDA-ARS fund.

798

### 799 **Author contributions**

800 TS and LL conceived and designed the research. TS performed the majority of the experiments.  
801 SZ carried out initial analysis of *GLK* lines. LO generated callus culture and aided some  
802 experiments. XW and ZF did whole genome analysis of *GLK* and *GBF* binding sites and  
803 identified the G-box motifs of *PSY* promoters. ZF, YZ, MM, and JGG contributed research  
804 agents, assisted data interpretation, and/or revised the manuscript. TS and LL wrote the article  
805 with contributions from all coauthors.

806

807

### 808 **LITERATURE CITED**

- 809 **Ahmad, R., Liu, Y., Wang, T.J., Meng, Q., Yin, H., Wang, X., Wu, Y., Nan, N., Liu, B., and Xu, Z.Y.**  
810 (2019). GOLDEN2-LIKE transcription factors regulate WRKY40 expression in response to abscisic  
811 acid. *Plant Physiol* **179**, 1844-1860.
- 812 **Alberti, S., Gladfelter, A., and Mittag, T.** (2019). Considerations and challenges in studying liquid-  
813 liquid phase separation and biomolecular condensates. *Cell* **176**, 419-434.
- 814 **Álvarez, D., Voss, B., Maass, D., Wüst, F., Schaub, P., Beyer, P., and Welsch, R.** (2016). 5'UTR-  
815 mediated translational control of splice variants of phytoene synthase. *Plant Physiol*, pp. 01262.02016.
- 816 **Banani, S.F., Lee, H.O., Hyman, A.A., and Rosen, M.K.** (2017). Biomolecular condensates: organizers  
817 of cellular biochemistry. *Nat Rev Mol Cell Biol* **18**, 285-298.
- 818 **Bolger, A.M., Lohse, M., and Usadel, B.** (2014). Trimmomatic: a flexible trimmer for Illumina  
819 sequence data. *Bioinformatics* **30**, 2114-2120.
- 820 **Bou-Torrent, J., Toledo-Ortiz, G., Ortiz-Alcaide, M., Cifuentes-Esquivel, N., Halliday, K.J.,**  
821 **Martinez-García, J.F., and Rodríguez-Concepcion, M.** (2015). Regulation of carotenoid  
822 biosynthesis by shade relies on specific subsets of antagonistic transcription factors and cofactors.  
823 *Plant Physiol* **169**, 1584-1594.
- 824 **Chakrabortee, S., Kayatekin, C., Newby, G.A., Mendillo, M.L., Lancaster, A., and Lindquist, S.**  
825 (2016). Luminidependens (LD) is an Arabidopsis protein with prion behavior. *Proc Natl Acad Sci U*  
826 *S A* **113**, 6065-6070.

- 827 **Chen, D., Xu, G., Tang, W., Jing, Y., Ji, Q., Fei, Z., and Lin, R.** (2013). Antagonistic basic helix-loop-  
828 helix/bZIP transcription factors form transcriptional modules that integrate light and reactive oxygen  
829 species signaling in Arabidopsis. *Plant Cell* **25**, 1657-1673.
- 830 **Chen, M., Ji, M., Wen, B., Liu, L., Li, S., Chen, X., Gao, D., and Li, L.** (2016). GOLDEN 2-LIKE  
831 transcription factors of plants. *Front Plant Sci* **7**, 1509.
- 832 **Chu, X., Sun, T., Li, Q., Xu, Y., Zhang, Z., Lai, L., and Pei, J.** (2022). Prediction of liquid-liquid phase  
833 separating proteins using machine learning. *BMC Bioinformatics* **23**, 72.
- 834 **Corrêa, L.G.G., Riaño-Pachón, D.M., Schrago, C.G., Vicentini dos Santos, R., Mueller-Roeber, B.,  
835 and Vincentz, M.** (2008). The role of bZIP transcription factors in green plant evolution: adaptive  
836 features emerging from four founder genes. *PloS one* **3**, e2944.
- 837 **Cunningham Jr, F., and Gantt, E.** (1998). Genes and enzymes of carotenoid biosynthesis in plants.  
838 *Annu Rev Plant Biol* **49**, 557-583.
- 839 **Ding, Y., Sun, T., Ao, K., Peng, Y., Zhang, Y., Li, X., and Zhang, Y.** (2018). Opposite roles of  
840 salicylic acid receptors NPR1 and NPR3/NPR4 in transcriptional regulation of plant immunity. *Cell*  
841 **173**, 1454-1467.e1415.
- 842 **Dröge-Laser, W., Snoek, B.L., Snel, B., and Weiste, C.** (2018). The Arabidopsis bZIP transcription  
843 factor family—an update. *Curr Opin Plant Biol* **45**, 36-49.
- 844 **Emenecker, R.J., Holehouse, A.S., and Strader, L.C.** (2021). Biological phase separation and  
845 biomolecular condensates in plants. *Annu Rev Plant Biol* **72**, 17-46.
- 846 **Fang, X., Wang, L., Ishikawa, R., Li, Y., Fiedler, M., Liu, F., Calder, G., Rowan, B., Weigel, D., Li,  
847 P., and Dean, C.** (2019). Arabidopsis FLL2 promotes liquid–liquid phase separation of  
848 polyadenylation complexes. *Nature* **569**, 265-269.
- 849 **Fitter, D.W., Martin, D.J., Copley, M.J., Scotland, R.W., and Langdale, J.A.** (2002). GLK gene pairs  
850 regulate chloroplast development in diverse plant species. *Plant J* **31**, 713-727.
- 851 **Friedman, J.S., Khanna, H., Swain, P.K., Denicola, R., Cheng, H., Mitton, K.P., Weber, C.H., Hicks,  
852 D., and Swaroop, A.** (2004). The minimal transactivation domain of the basic motif-leucine zipper  
853 transcription factor NRL interacts with TATA-binding protein. *J Biol Chem* **279**, 47233-47241.
- 854 **Gonzalez, A., Zhao, M., Leavitt, J.M., and Lloyd, A.M.** (2008). Regulation of the anthocyanin  
855 biosynthetic pathway by the TTG1/bHLH/Myb transcriptional complex in Arabidopsis seedlings.  
856 *Plant J* **53**, 814-827.
- 857 **Huq, E., Al-Sady, B., Hudson, M., Kim, C., Apel, K., and Quail, P.H.** (2004). Phytochrome-  
858 interacting factor 1 is a critical bHLH regulator of chlorophyll biosynthesis. *Science* **305**, 1937-1941.
- 859 **Jin, X., Baysal, C., Drapal, M., Sheng, Y., Huang, X., He, W., Shi, L., Capell, T., Fraser, P.D., and  
860 Christou, P.** (2021). The Coordinated upregulated expression of genes involved in MEP, chlorophyll,



861 carotenoid and tocopherol pathways, mirrored the corresponding metabolite contents in rice leaves  
862 during de-etiolation. *Plants* **10**, 1456.

863 **Kim, J., Lee, H., Lee, H.G., and Seo, P.J.** (2021). Get closer and make hotspots: liquid-liquid phase  
864 separation in plants. *EMBO Rep* **22**, e51656.

865 **Kobayashi, K., Baba, S., Obayashi, T., Sato, M., Toyooka, K., Keränen, M., Aro, E.-M., Fukaki, H.,**  
866 **Ohta, H., and Sugimoto, K.** (2012). Regulation of root greening by light and auxin/cytokinin  
867 signaling in *Arabidopsis*. *Plant Cell* **24**, 1081-1095.

868 **Kobayashi, K., Sasaki, D., Noguchi, K., Fujinuma, D., Komatsu, H., Kobayashi, M., Sato, M.,**  
869 **Toyooka, K., Sugimoto, K., and Niyogi, K.K.** (2013). Photosynthesis of root chloroplasts developed  
870 in *Arabidopsis* lines overexpressing GOLDEN2-LIKE transcription factors. *Plant Cell Physiol* **54**,  
871 1365-1377.

872 **Kurihara, Y., Makita, Y., Shimohira, H., and Matsui, M.** (2020). Time-course transcriptome study  
873 reveals mode of bZIP transcription factors on light exposure in *Arabidopsis*. *IJMS* **21**, 1993.

874 **Langmead, B., and Salzberg, S.L.** (2012). Fast gapped-read alignment with Bowtie 2. *Nat Methods* **9**,  
875 357-359.

876 **Li, M., Lee, K.P., Liu, T., Dogra, V., Duan, J., Li, M., Xing, W., and Kim, C.** (2022). Antagonistic  
877 modules regulate photosynthesis-associated nuclear genes via GOLDEN2-LIKE transcription factors.  
878 *Plant Physiol* **188**, 2308-2324.

879 **Li, X., Wang, P., Li, J., Wei, S., Yan, Y., Yang, J., Zhao, M., Langdale, J.A., and Zhou, W.** (2020).  
880 Maize GOLDEN2-LIKE genes enhance biomass and grain yields in rice by improving photosynthesis  
881 and reducing photoinhibition. *Commun Biol* **3**, 1-12.

882 **Llorca, C.M., Berendzen, K.W., Malik, W.A., Mahn, S., Piepho, H.-P., and Zentgraf, U.** (2015). The  
883 elucidation of the interactome of 16 *Arabidopsis* bZIP factors reveals three independent functional  
884 networks. *PLoS One* **10**, e0139884.

885 **Lu, S., Ye, J., Zhu, K., Zhang, Y., Zhang, M., Xu, Q., and Deng, X.** (2021). A fruit ripening-associated  
886 transcription factor CsMADS5 positively regulates carotenoid biosynthesis in citrus. *J Exp Bot* **72**,  
887 3028-3043.

888 **Maass, D., Arango, J., Wüst, F., Beyer, P., and Welsch, R.** (2009). Carotenoid crystal formation in  
889 *Arabidopsis* and carrot roots caused by increased phytoene synthase protein levels. *PloS one* **4**, e6373.

890 **Martín, G., Leivar, P., Ludevid, D., Tepperman, J.M., Quail, P.H., and Monte, E.** (2016).  
891 Phytochrome and retrograde signalling pathways converge to antagonistically regulate a light-induced  
892 transcriptional network. *Nat Commun* **7**, 11431.



- 893 **Martínez, C., Espinosa-Ruíz, A., de Lucas, M., Bernardo-García, S., Franco-Zorrilla, J.M., and**  
894 **Prat, S.** (2018). PIF4-induced BR synthesis is critical to diurnal and thermomorphogenic growth.  
895 *EMBO J* **37**.
- 896 **Menkens, A.E., Schindler, U., and Cashmore, A.R.** (1995). The G-box: a ubiquitous regulatory DNA  
897 element in plants bound by the GBF family of bZIP proteins. *Trends Biochem Sci* **20**, 506-510.
- 898 **Moon, J., Zhu, L., Shen, H., and Huq, E.** (2008). PIF1 directly and indirectly regulates chlorophyll  
899 biosynthesis to optimize the greening process in Arabidopsis. *Proc Natl Acad Sci U S A* **105**, 9433-  
900 9438.
- 901 **Murmu, J., Wilton, M., Allard, G., Pandeya, R., Desveaux, D., Singh, J., and Subramaniam, R.**  
902 (2014). Arabidopsis GOLDEN2-LIKE (GLK) transcription factors activate jasmonic acid (JA)-  
903 dependent disease susceptibility to the biotrophic pathogen *Hyaloperonospora arabidopsidis*, as well  
904 as JA-independent plant immunity against the necrotrophic pathogen *Botrytis cinerea*. *Mol Plant*  
905 *Pathol* **15**, 174-184.
- 906 **Nakagawa, T., Suzuki, T., Murata, S., Nakamura, S., Hino, T., Maeo, K., Tabata, R., Kawai, T.,**  
907 **Tanaka, K., Niwa, Y., Watanabe, Y., Nakamura, K., Kimura, T., and Ishiguro, S.** (2007).  
908 Improved Gateway binary vectors: high-performance vectors for creation of fusion constructs in  
909 transgenic analysis of plants. *Biosci Biotechnol Biochem* **71**, 2095-2100.
- 910 **Nakamura, H., Muramatsu, M., Hakata, M., Ueno, O., Nagamura, Y., Hirochika, H., Takano, M.,**  
911 **and Ichikawa, H.** (2009). Ectopic overexpression of the transcription factor OsGLK1 induces  
912 chloroplast development in non-green rice cells. *Plant Cell Physiol* **50**, 1933-1949.
- 913 **Nguyen, C.V., Vrebalov, J.T., Gapper, N.E., Zheng, Y., Zhong, S., Fei, Z., and Giovannoni, J.J.**  
914 (2014). Tomato GOLDEN2-LIKE transcription factors reveal molecular gradients that function  
915 during fruit development and ripening. *Plant Cell* **26**, 585-601.
- 916 **Ni, F., Wu, L., Wang, Q., Hong, J., Qi, Y., and Zhou, X.** (2017). Turnip Yellow Mosaic Virus P69  
917 Interacts with and Suppresses GLK Transcription Factors to Cause Pale-Green Symptoms in  
918 Arabidopsis. *Mol Plant* **10**, 764-766.
- 919 **Nusinow, D.A., Helfer, A., Hamilton, E.E., King, J.J., Imaizumi, T., Schultz, T.F., Farré, E.M., and**  
920 **Kay, S.A.** (2011). The ELF4-ELF3-LUX complex links the circadian clock to diurnal control of  
921 hypocotyl growth. *Nature* **475**, 398-402.
- 922 **Obayashi, T., Aoki, Y., Tadaka, S., Kagaya, Y., and Kinoshita, K.** (2018). ATTED-II in 2018: A Plant  
923 Coexpression Database Based on Investigation of the Statistical Property of the Mutual Rank Index.  
924 *Plant Cell Physiol* **59**, e3.

- 925 **Paiz, E.A., Allen, J.H., Correia, J.J., Fitzkee, N.C., Hough, L.E., and Whitten, S.T.** (2021). Beta turn  
926 propensity and a model polymer scaling exponent identify intrinsically disordered phase-separating  
927 proteins. *J Biol Chem* **297**, 101343.
- 928 **Powell, A.L., Nguyen, C.V., Hill, T., Cheng, K.L., Figueroa-Balderas, R., Aktas, H., Ashrafi, H.,**  
929 **Pons, C., Fernández-Muñoz, R., Vicente, A., Lopez-Baltazar, J., Barry, C.S., Liu, Y., Chetelat,**  
930 **R., Granell, A., Deynze, A.V., Giovannoni, J.J., and Bennett, A.B.** (2012). Uniform ripening  
931 encodes a Golden 2-like transcription factor regulating tomato fruit chloroplast development. *Science*  
932 **336**, 1711-1715.
- 933 **Rauf, M., Arif, M., Dortay, H., Matallana-Ramírez, L.P., Waters, M.T., Gil Nam, H., Lim, P.O.,**  
934 **Mueller-Roeber, B., and Balazadeh, S.** (2013). ORE1 balances leaf senescence against maintenance  
935 by antagonizing G2-like-mediated transcription. *EMBO Rep* **14**, 382-388.
- 936 **Robinson, J.T., Thorvaldsdóttir, H., Winckler, W., Guttman, M., Lander, E.S., Getz, G., and**  
937 **Mesirov, J.P.** (2011). Integrative genomics viewer. *Nat Biotechnol* **29**, 24-26.
- 938 **Rossini, L., Cribb, L., Martin, D.J., and Langdale, J.A.** (2001). The maize golden2 gene defines a  
939 novel class of transcriptional regulators in plants. *Plant Cell* **13**, 1231-1244.
- 940 **Ruiz-Sola, M.Á., and Rodríguez-Concepción, M.** (2012). Carotenoid biosynthesis in Arabidopsis: a  
941 colorful pathway. *The Arabidopsis book/American Society of Plant Biologists* **10**.
- 942 **Sabari, B.R., Dall’Agnese, A., and Young, R.A.** (2020). Biomolecular condensates in the nucleus.  
943 *Trends Biochem Sci* **45**, 961-977.
- 944 **Schaub, P., Rodriguez-Franco, M., Cazzonelli, C.I., Álvarez, D., Wüst, F., and Welsch, R.** (2018).  
945 Establishment of an Arabidopsis callus system to study the interrelations of biosynthesis, degradation  
946 and accumulation of carotenoids. *PloS one* **13**, e0192158.
- 947 **Schneider, C.A., Rasband, W.S., and Eliceiri, K.W.** (2012). NIH Image to ImageJ: 25 years of image  
948 analysis. *Nat Methods* **9**, 671-675.
- 949 **Shen, W.** (2021). An investigation of transcription factor regulatory mechanism in plants (Ann Arbor:  
950 The Chinese University of Hong Kong (Hong Kong)), pp. 137.
- 951 **Singh, A., Ram, H., Abbas, N., and Chattopadhyay, S.** (2012). Molecular interactions of GBF1 with  
952 HY5 and HYH proteins during light-mediated seedling development in Arabidopsis thaliana. *J Biol*  
953 *Chem* **287**, 25995-26009.
- 954 **Smykowski, A., Zimmermann, P., and Zentgraf, U.** (2010). G-Box binding factor1 reduces  
955 CATALASE2 expression and regulates the onset of leaf senescence in Arabidopsis. *Plant Physiol* **153**,  
956 1321-1331.
- 957 **Stanley, L., and Yuan, Y.-W.** (2019). Transcriptional regulation of carotenoid biosynthesis in plants: So  
958 many regulators, so little consensus. *Front Plant Sci* **10**, 1017.

- 959 **Sun, T., and Li, L.** (2020). Toward the ‘golden’era: the status in uncovering the regulatory control of  
960 carotenoid accumulation in plants. *Plant Sci* **290**, 110331.
- 961 **Sun, T., Rao, S., Zhou, X., and Li, L.** (2022a). Plant carotenoids: recent advances and future  
962 perspectives. *Mol Hortic* **2**, 1-21.
- 963 **Sun, T., Zhou, X., Rao, S., Liu, J., and Li, L.** (2022b). Protein-protein interaction techniques to  
964 investigate post-translational regulation of carotenogenesis. *Methods in Enzymology* **671**, 301-325.
- 965 **Sun, T., Yuan, H., Chen, C., Kadirjan-Kalbach, D.K., Mazourek, M., Osteryoung, K.W., and Li, L.**  
966 (2020). ORHis, a natural variant of OR, specifically interacts with plastid division factor ARC3 to  
967 regulate chromoplast number and carotenoid accumulation. *Mol Plant* **13**, 864-878.
- 968 **Sun, T., Zhou, F., Huang, X.-Q., Chen, W.-C., Kong, M.-J., Zhou, C.-F., Zhuang, Z., Li, L., and Lu,**  
969 **S.** (2019). ORANGE represses chloroplast biogenesis in etiolated *Arabidopsis* cotyledons via  
970 interaction with TCP14. *Plant Cell* **31**, 2996-3014.
- 971 **Sun, T., Wang, P., Lu, S., Yuan, H., Yang, Y., Fish, T., Thannhauser, T., Liu, J., Mazourek, M.,**  
972 **Grimm, B., and Li, L.** (2022c). Orchestration of chlorophyll and carotenoid biosynthesis by  
973 ORANGE family proteins in plant. *BioRxiv*, 2022.2002.2008.479616.
- 974 **Szklarczyk, D., Gable, A.L., Lyon, D., Junge, A., Wyder, S., Huerta-Cepas, J., Simonovic, M.,**  
975 **Doncheva, N.T., Morris, J.H., and Bork, P.** (2019). STRING v11: protein–protein association  
976 networks with increased coverage, supporting functional discovery in genome-wide experimental  
977 datasets. *Nucleic Acids Res* **47**, D607-D613.
- 978 **Tamai, H., Iwabuchi, M., and Meshi, T.** (2002). *Arabidopsis* GARP transcriptional activators interact  
979 with the Pro-rich activation domain shared by G-box-binding bZIP factors. *Plant Cell Physiol* **43**, 99-  
980 107.
- 981 **Toledo-Ortiz, G., Huq, E., and Rodríguez-Concepción, M.** (2010). Direct regulation of phytoene  
982 synthase gene expression and carotenoid biosynthesis by phytochrome-interacting factors.  
983 *Proceedings of the National Academy of Sciences* **107**, 11626-11631.
- 984 **Toledo-Ortiz, G., Johansson, H., Lee, K.P., Bou-Torrent, J., Stewart, K., Steel, G., Rodríguez-**  
985 **Concepción, M., and Halliday, K.J.** (2014). The HY5-PIF regulatory module coordinates light and  
986 temperature control of photosynthetic gene transcription. *PLoS Genet* **10**.
- 987 **Tu, X., Mejía-Guerra, M.K., Valdes Franco, J.A., Tzeng, D., Chu, P.-Y., Shen, W., Wei, Y., Dai, X.,**  
988 **Li, P., and Buckler, E.S.** (2020). Reconstructing the maize leaf regulatory network using ChIP-seq  
989 data of 104 transcription factors. *Nat Commun* **11**, 1-13.
- 990 **Waters, M.T., and Langdale, J.A.** (2009). The making of a chloroplast. *EMBO J* **28**, 2861-2873.
- 991 **Waters, M.T., Moylan, E.C., and Langdale, J.A.** (2008). GLK transcription factors regulate chloroplast  
992 development in a cell-autonomous manner. *Plant J* **56**, 432-444.

- 993 **Waters, M.T., Wang, P., Korkaric, M., Capper, R.G., Saunders, N.J., and Langdale, J.A.** (2009).  
994 GLK transcription factors coordinate expression of the photosynthetic apparatus in Arabidopsis. *Plant*  
995 *Cell* **21**, 1109-1128.
- 996 **Welsch, R., Zhou, X., Yuan, H., Álvarez, D., Sun, T., Schlossarek, D., Yang, Y., Shen, G., Zhang, H.,**  
997 **Rodriguez-Concepcion, M., Thannhauser, T.W., and Li, L.** (2018). Clp protease and OR directly  
998 control the proteostasis of phytoene synthase, the crucial enzyme for carotenoid biosynthesis in  
999 Arabidopsis. *Mol Plant* **11**, 149-162.
- 1000 **Wu, M., Xu, X., Hu, X., Liu, Y., Cao, H., Chan, H., Gong, Z., Yuan, Y., Luo, Y., Feng, B., Li, Z.,**  
1001 **and Deng, W.** (2020). SIMYB72 regulates the metabolism of chlorophylls, carotenoids, and  
1002 flavonoids in tomato fruit. *Plant Physiol* **183**, 854-868.
- 1003 **Xie, D., Chen, M., Niu, J., Wang, L., Li, Y., Fang, X., Li, P., and Qi, Y.** (2021). Phase separation of  
1004 SERRATE drives dicing body assembly and promotes miRNA processing in Arabidopsis. *Nat Cell*  
1005 *Biol* **23**, 32-39.
- 1006 **Xie, X., Ma, X., Zhu, Q., Zeng, D., Li, G., and Liu, Y.G.** (2017). CRISPR-GE: a convenient software  
1007 toolkit for CRISPR-based genome editing. *Mol Plant* **10**, 1246-1249.
- 1008 **Xiong, C., Luo, D., Lin, A., Zhang, C., Shan, L., He, P., Li, B., Zhang, Q., Hua, B., Yuan, Z., Li, H.,**  
1009 **Zhang, J., Yang, C., Lu, Y., Ye, Z., and Wang, T.** (2019). A tomato B-box protein SIBBX20  
1010 modulates carotenoid biosynthesis by directly activating PHYTOENE SYNTHASE 1, and is targeted  
1011 for 26S proteasome-mediated degradation. *New Phytol* **221**, 279-294.
- 1012 **Xu, K., Huang, X., Wu, M., Wang, Y., Chang, Y., Liu, K., Zhang, J., Zhang, Y., Zhang, F., Yi, L.,**  
1013 **Li, T., Wang, R., Tan, G., and Li, C.** (2014). A rapid, highly efficient and economical method of  
1014 *Agrobacterium*-mediated in planta transient transformation in living onion epidermis. *PLoS One* **9**,  
1015 e83556.
- 1016 **Yasumura, Y., Moylan, E.C., and Langdale, J.A.** (2005). A conserved transcription factor mediates  
1017 nuclear control of organelle biogenesis in anciently diverged land plants. *Plant Cell* **17**, 1894-1907.
- 1018 **Yazdani, M., Sun, Z., Yuan, H., Zeng, S., Thannhauser, T.W., Vrebalov, J., Ma, Q., Xu, Y., Fei, Z.,**  
1019 **Van Eck, J., Tian, S., Tadmor, Y., Giovannoni, J.J., and Li, L.** (2019). Ectopic expression of  
1020 ORANGE promotes carotenoid accumulation and fruit development in tomato. *Plant Biotechnol J* **17**,  
1021 33-49.
- 1022 **Yeh, S.-Y., Lin, H.-H., Chang, Y.-M., Chang, Y.-L., Chang, C.-K., Huang, Y.-C., Ho, Y.-W., Lin,**  
1023 **C.-Y., Zheng, J.-Z., Jane, W.-N., Ng, C.-Y., Lu, M.-Y., Lai, I.-L., To, K.-Y., Li, W.-H., and Ku,**  
1024 **M.S.B.** (2022). Maize Golden2-like transcription factors boost rice chloroplast development,  
1025 photosynthesis, and grain yield. *Plant Physiol* **188**, 442-459.

- 1026 **Yu, H., and Zhao, Y.** (2019). Fluorescence Marker-Assisted Isolation of Cas9-Free and CRISPR-Edited  
1027 Arabidopsis Plants. In *Plant Genome Editing with CRISPR Systems: Methods and Protocols*, Y. Qi,  
1028 ed (New York, NY: Springer New York), pp. 147-154.
- 1029 **Yuan, H., Owsiany, K., Sheeja, T., Zhou, X., Rodriguez, C., Li, Y., Welsch, R., Chayut, N., Yang, Y.,**  
1030 **Thannhauser, T.W., Mandayam V Parthasarathy, Qiang Xu, Xiuxin Deng, Zhangjun Fei, Ari**  
1031 **Schaffer, Nurit Katzir, Joseph Burger, Yaakov Tadmor, and Li, L.** (2015). A single amino acid  
1032 substitution in an ORANGE protein promotes carotenoid overaccumulation in Arabidopsis. *Plant*  
1033 *Physiol* **169**, 421-431.
- 1034 **Zhang, D., Tan, W., Yang, F., Han, Q., Deng, X., Guo, H., Liu, B., Yin, Y., and Lin, H.** (2021). A  
1035 BIN2-GLK1 signaling module integrates brassinosteroid and light signaling to repress chloroplast  
1036 development in the dark. *Dev Cell* **56**, 310-324. e317.
- 1037 **Zhang, Y., Liu, T., Meyer, C.A., Eeckhoute, J., Johnson, D.S., Bernstein, B.E., Nusbaum, C., Myers,**  
1038 **R.M., Brown, M., Li, W., and Liu, S.X.** (2008). Model-based analysis of ChIP-Seq (MACS).  
1039 *Genome Biology* **9**, 1-9.
- 1040 **Zhao, D., Zheng, Y., Yang, L., Yao, Z., Cheng, J., Zhang, F., Jiang, H., and Liu, D.** (2021). The  
1041 transcription factor AtGLK1 acts upstream of MYBL2 to genetically regulate sucrose-induced  
1042 anthocyanin biosynthesis in Arabidopsis. *BMC Plant Biol* **21**, 242.
- 1043 **Zhou, F., Sun, T.H., Zhao, L., Pan, X.W., and Lu, S.** (2015a). The bZIP transcription factor HY5  
1044 interacts with the promoter of the monoterpene synthase gene QH6 in modulating its rhythmic  
1045 expression. *Front Plant Sci* **6**, 304.
- 1046 **Zhou, X., Rao, S., Wrightstone, E., Sun, T., Lui, A., Welsch, R., and Li, L.** (2022). Phytoene synthase:  
1047 the key rate-limiting enzyme of carotenoid biosynthesis in plants. *Front Plant Sci*, 977.
- 1048 **Zhou, X., Welsch, R., Yang, Y., Álvarez, D., Riediger, M., Yuan, H., Fish, T., Liu, J., Thannhauser,**  
1049 **T.W., and Li, L.** (2015b). Arabidopsis OR proteins are the major posttranscriptional regulators of  
1050 phytoene synthase in controlling carotenoid biosynthesis. *Proceedings of the National Academy of*  
1051 *Sciences* **112**, 3558-3563.
- 1052 **Zhou, Z., Bi, G., and Zhou, J.M.** (2018). Luciferase complementation assay for protein-protein  
1053 interactions in plants. *Curr Ptotoc Plant Biol* **3**, 42-50.
- 1054 **Zhu, J.Y., Oh, E., Wang, T., and Wang, Z.Y.** (2016). TOC1-PIF4 interaction mediates the circadian  
1055 gating of thermoresponsive growth in Arabidopsis. *Nat Commun* **7**, 13692.
- 1056 **Zhu, K., Sun, Q., Chen, H., Mei, X., Lu, S., Ye, J., Chai, L., Xu, Q., and Deng, X.** (2021a). Ethylene  
1057 activation of carotenoid biosynthesis by a novel transcription factor CsERF061. *J Exp Bot* **72**, 3137-  
1058 3154.

- 1059 **Zhu, P., Lister, C., and Dean, C.** (2021b). Cold-induced Arabidopsis FRIGIDA nuclear condensates for  
1060 FLC repression. *Nature* **599**, 657-661.
- 1061 **Zubo, Y.O., Blakley, I.C., Franco-Zorrilla, J.M., Yamburenko, M.V., Solano, R., Kieber, J.J.,**  
1062 **Loraine, A.E., and Schaller, G.E.** (2018). Coordination of chloroplast development through the  
1063 action of the GNC and GLK transcription factor families. *Plant Physiol* **178**, 130-147.
- 1064



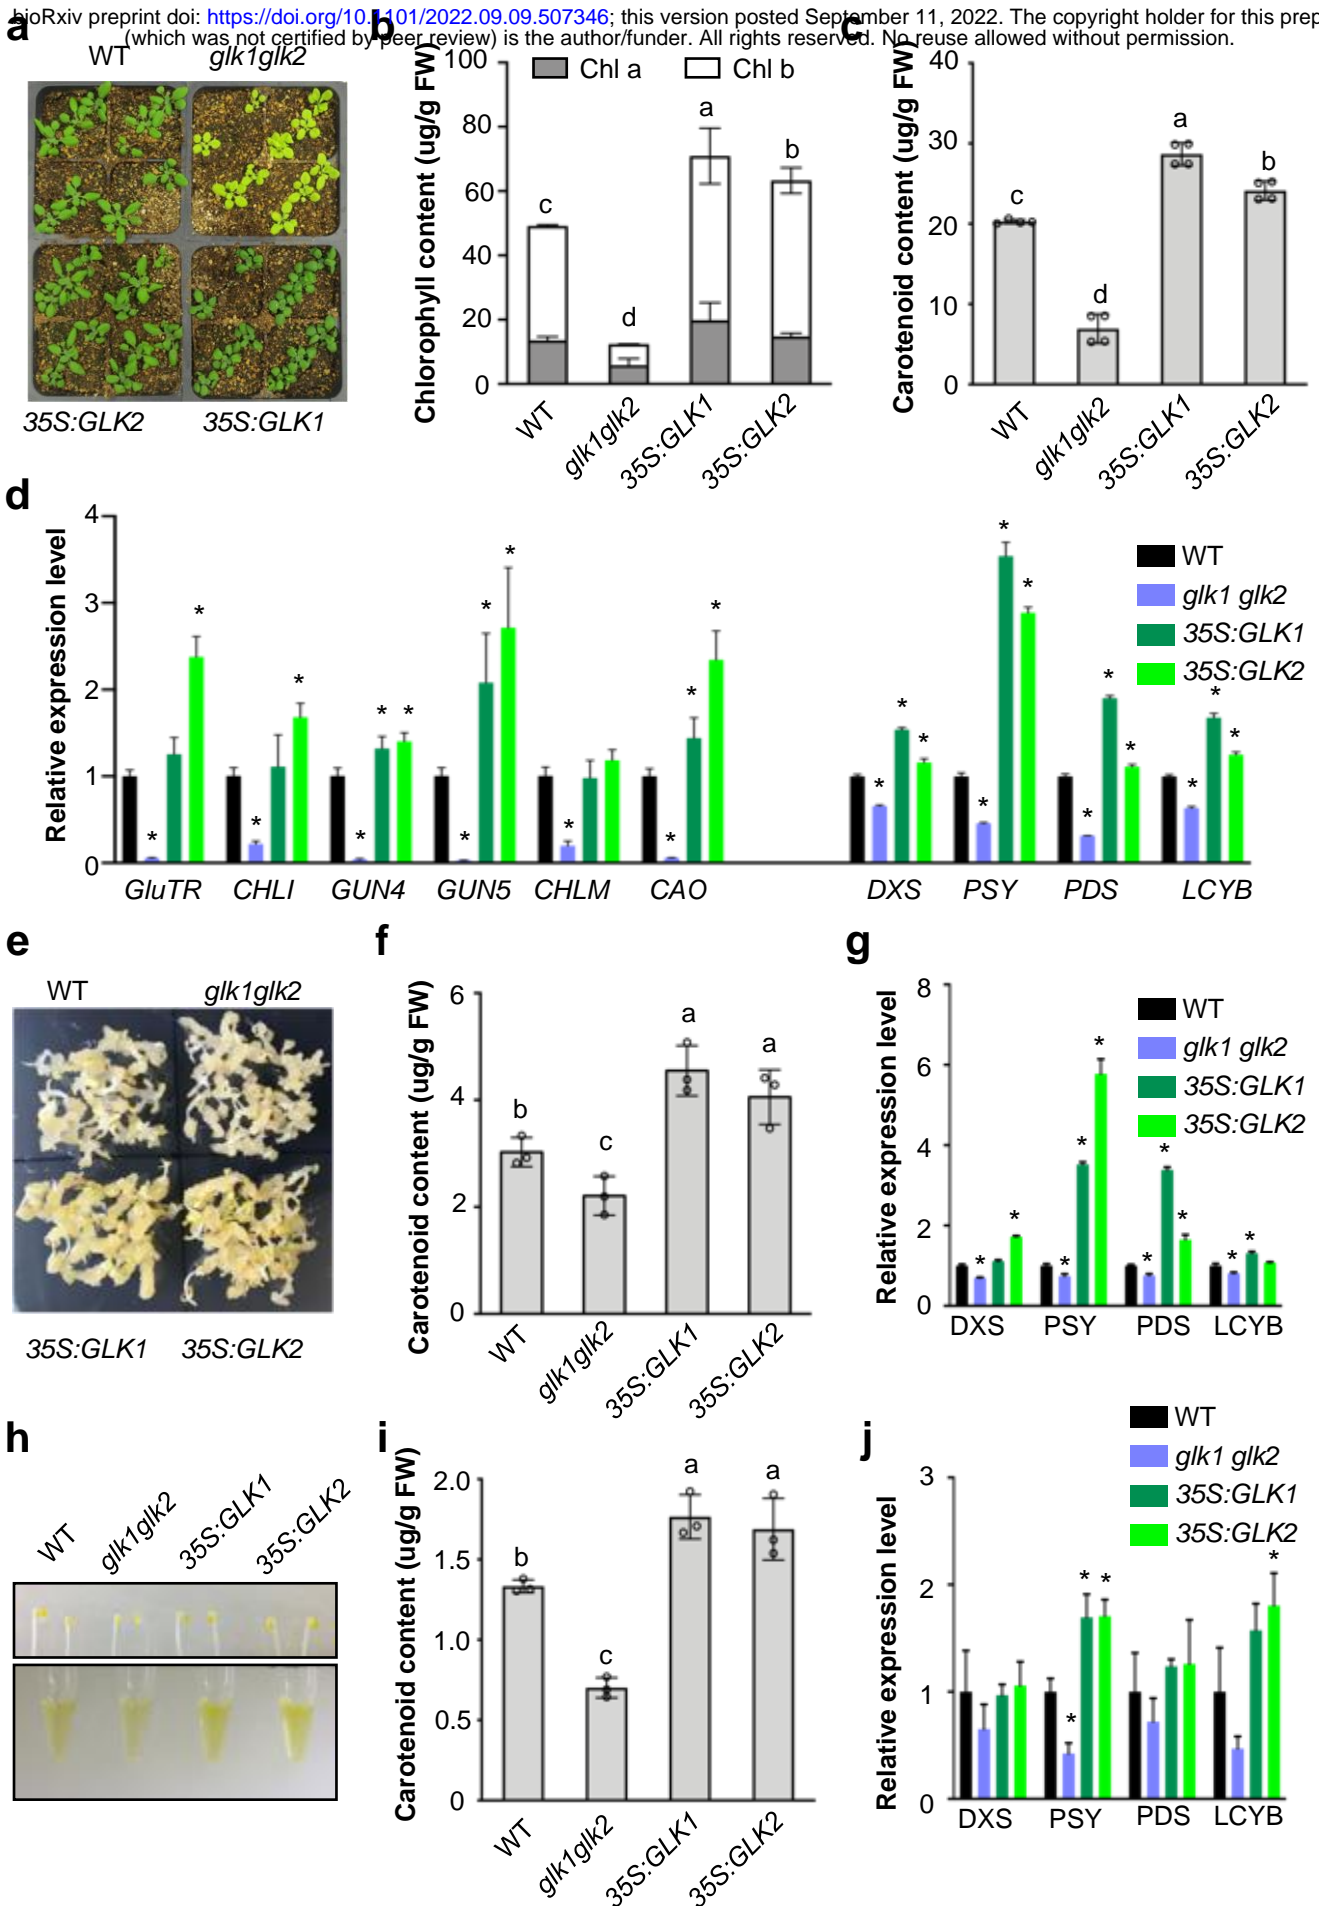

**Figure 1. Direct regulation of carotenoid biosynthesis by GLK transcription factors. a,** Representative images of 20-day-old WT, *glk1glk2*, *35S:GLK1*, and *35S:GLK2* Arabidopsis plants. **b&c,** Chlorophyll (**b**) and carotenoid (**c**) levels in leaves from 20-day-old WT, *glk1glk2*, *35S:GLK1*, and *35S:GLK2* plants. Data represent means  $\pm$  SD, n=4; **d,** Relative expression level of chlorophyll and carotenoid biosynthesis pathway genes in leaves from 20-day-old WT, *glk1glk2*, *35S:GLK1*, and *35S:GLK2* plants. **e,** Representative images of seed-derived callus induced from WT, *glk1glk2*, *35S:GLK1*, and *35S:GLK2* lines. **f,** Carotenoid levels from the calli of indicated lines. **g,** Relative expression levels of carotenoid biosynthesis pathway genes in those calli. **h,** Representative images of etiolated seedlings and carotenoid extracts. The seeds of WT, *glk1glk2*, *35S:GLK1*, and *35S:GLK2* lines were stratified at 4 °C in dark and transferred to 22 °C in dark for 4 days to develop etiolated seedlings. **i,** Carotenoid content in the etiolated seedlings from indicated lines. **J,** Relative expression levels of carotenoid biosynthesis pathway genes from the etiolated seedlings. **d, f, g, i & j,** Data represent means  $\pm$  SD, n=3. **b, c, f&i,** Multiple comparison following one-way ANOVA analysis; **d, g & j,** Student's *t* test, \*, p<0.05

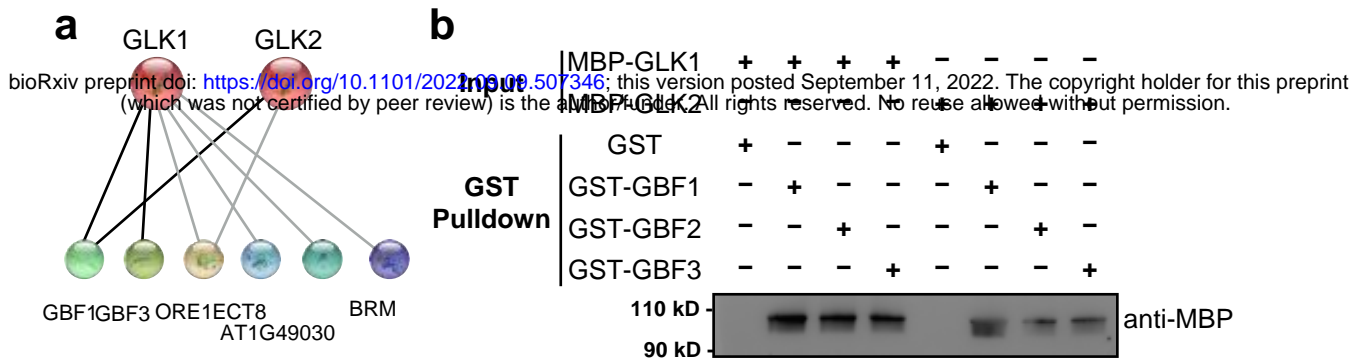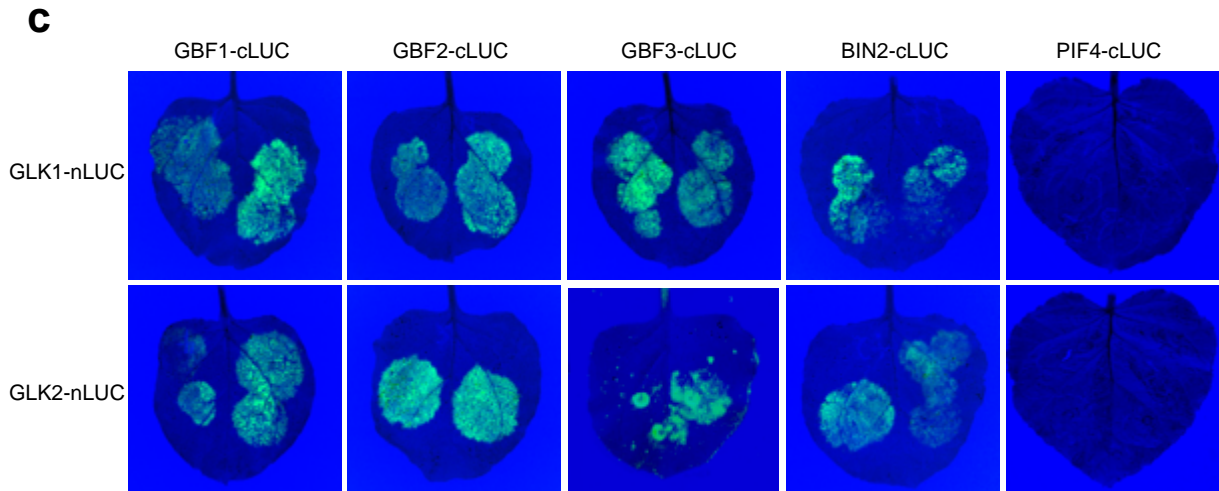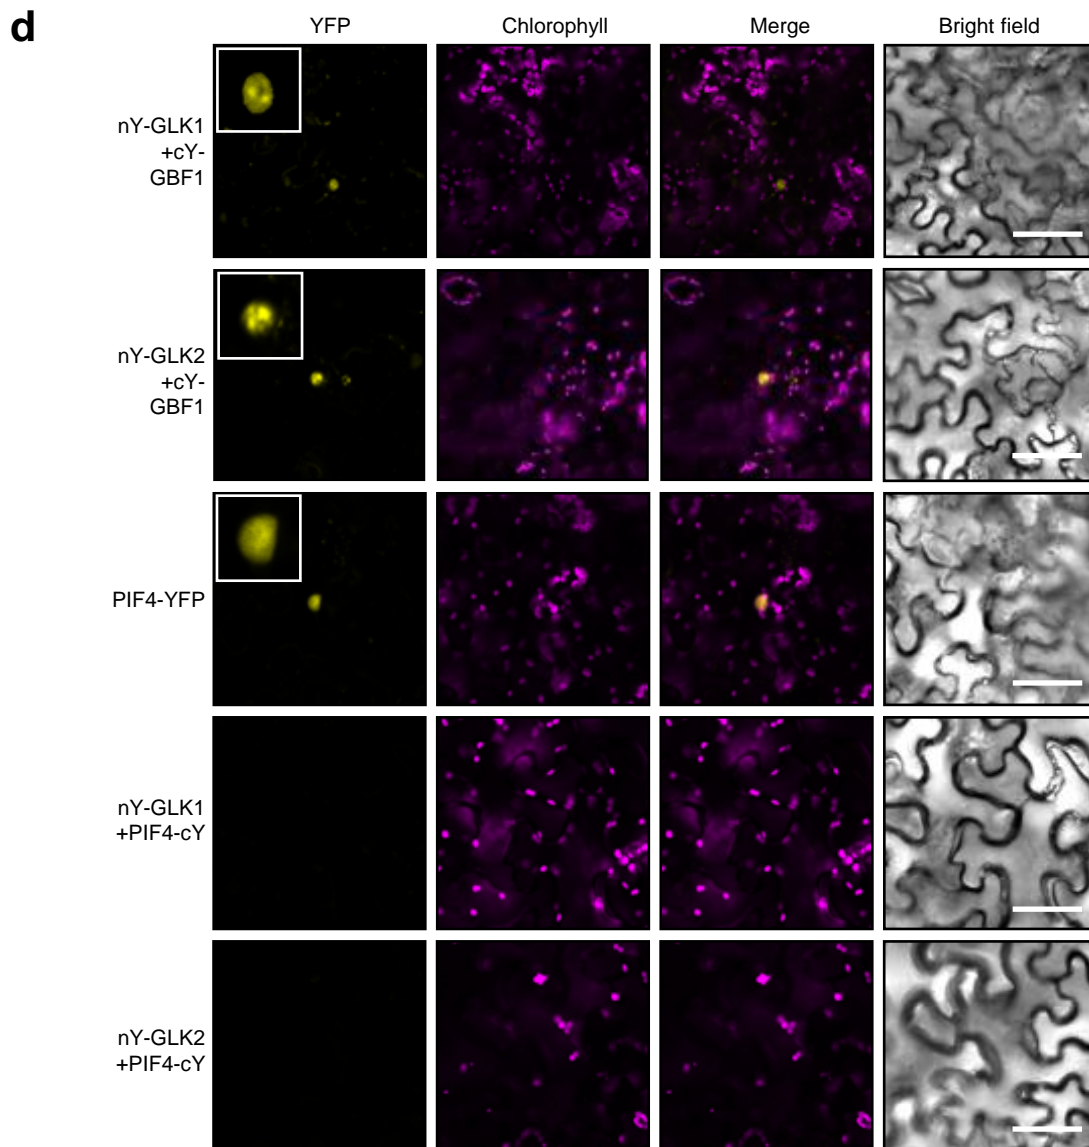

**Figure 2: Interactions between GLK and GBF transcription factors.** **a**, Protein-protein interaction prediction of GLKs by STRING (<https://string-db.org>). All predicted physical interaction partners are shown. **b**, Pulldown assay to test protein-protein interactions. GST-GBF1, GBF2, GBF3 fusion proteins and GST tag only were incubated with MBP-GLK1 or MBP-GLK2 and captured by GST affinity purification beads. The bound proteins were eluted, resolved by SDS-PAGE, blotted, and probed with an antibody against MBP tag. **c**, *In vivo* luciferase complementation assay between GLKs and interaction partners. GLKs were fused to N-terminus of luciferase and the interaction partners were fused to C-terminus of luciferase. BIN2 and PIF4 was used as positive and negative control, respectively. **d**, BiFC assay of GLK1-nYFP (GLK1-nY) or GLK2-nY co-transformed with GBF1-cYFP (GBF1-cY) in *Nicotiana benthamiana*. PIF4-YFP was used as a nuclei marker. PIF4-cY was served as negative control. Insets represented enlarged images of nuclei. Scale bars, 20  $\mu$ m.

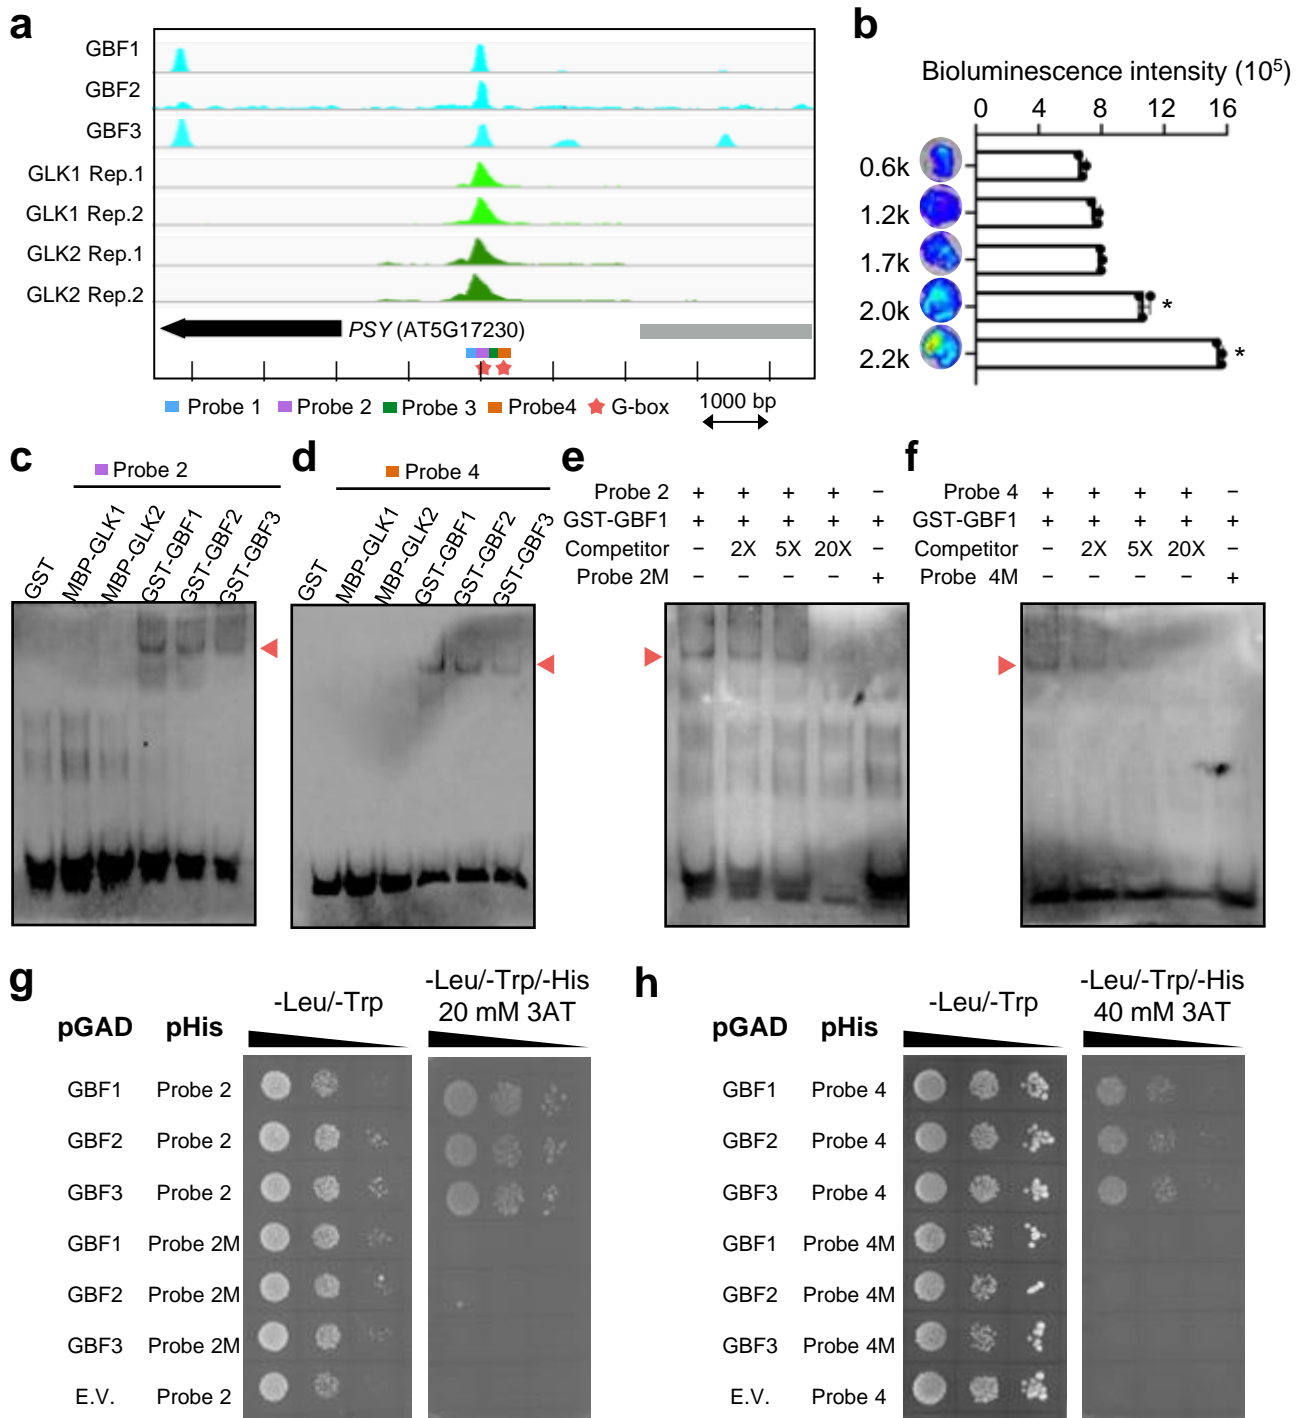

**Figure 3. GBFs directly bind to the G-box motif in the *PSY* promoter. **a**, Analysis of GLK**

and GBF binding peaks on the *PSY* promoter from ChIP-seq experiments reported by Kurihara et al., (2020) and <https://www.ncbi.nlm.nih.gov/bioproject/?term=PRJNA682315>. Stars indicate the presence of G-box motifs. Four DNA probes covering the peak area for further protein-DNA interaction analysis were also labeled. **b**, Promoter activity assay. Luciferase reporter constructs driven by different truncation of the *PSY* promoter were transformed to *Nicotiana benthamiana* leaves by Agrobacteria-mediated transformation. Two days after infiltration, luciferin solution was sprayed on the leave 10 min before the images were captured. Quantification of luminescence strengths on leaf areas was measured three times by IVIS live imaging system. Data are means  $\pm$  SE. Asterisks indicate significant differences (Student's t test,  $P < 0.05$ ). **c-f**, Electrophoretic mobility shift assay. The bindings of GBF and GLK proteins to the G-box containing Probe 2 (**c**) and Probe 4 (**d**) were examined. Unlabeled probes were used as competitors and mutant probes (Probe 2M and Probe 4M) with mutated G-box motifs in Probe 2 and Probe 4 were used as negative controls (**e&f**). **g&h**, Yeast one hybrid assay. Probe 2 and Probe 4 sequences as wells mutant Probe 2M and Probe 4M sequences were cloned to pHIS2.1, which drives the expression of *HIS3*. GBFs were cloned to pGADT7. Yeast cells were co-transformed with a combination of the indicated plasmids or empty vector and plated onto nonselective (-Leu/-Trp) and selective (-Leu/-Trp/-His) plates with proper concentration of 3-amino-1,2,4-triazole (3-AT) to inhibit the background expression of *HIS3*.



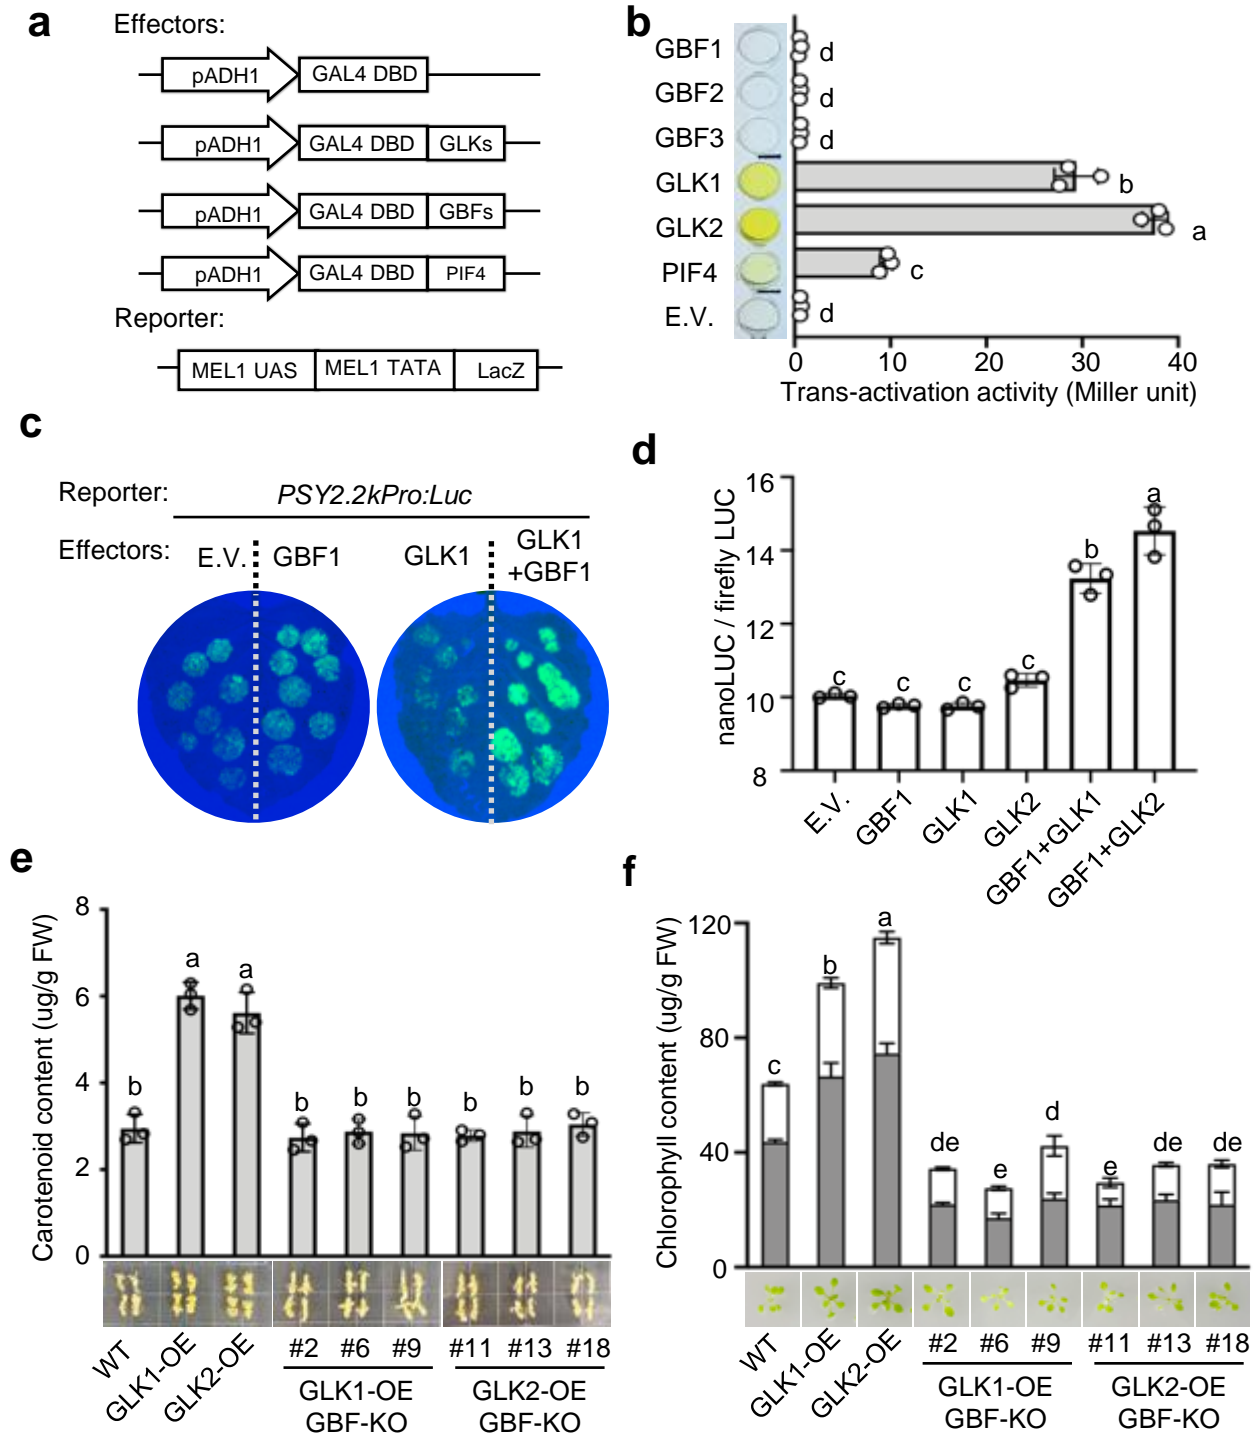

**Figure 4. GLKs trans-activate PSY through GBF transcription factors.** **a**, Trans-activation activity assay of transcription factors. As effectors, either the GBF, GLK, or PIF4 full-length ORFs were fused to DNA encoding the GAL4-DBD in the pDEST32 vector. *GAL<sub>pro</sub>:LacZ* in the yeast strain AH109 was used as a reporter (**a**).  $\beta$ -Galactosidase activities were quantified (in Miller units) to determine the activation of the *GAL<sub>pro</sub>:LacZ* reporter gene by the individual transcription factor. PIF4 was used as a positive control and yeast transformed with empty pDEST32 vector served as a negative control. Three independent transformants were measured for each construct. Data are means  $\pm$  SE. **c**, Trans-activation assay. Luciferase construct driven by 2.2k PSY promoter containing G-box motifs were used as reporter and 35S:GLK1 or 35S:GBF1 constructs were used as effectors. **d**, Quantification of the trans-activation using dual reporter (nanoLUC and fireflyLUC) assay. Data were analyzed by one-way ANOVA and Tukey multiple comparison. Carotenoid (**e**) and chlorophyll (**f**) levels in calli from WT, *GLK1-OE*, *GLK2-OE* and the *gbf1,2,3* triple knockout lines in *GLK1-OE* or *GLK2-OE* background determined by UPC<sup>2</sup>. Results are means  $\pm$  SE from three biological replicates. Letters indicate significant groups analyzed by ANOVA and Tukey multiple comparison. The representative image of calli induced from those lines (**e**) and two-week-old plants from 1/2 MS agar plates (**f**) were also shown.

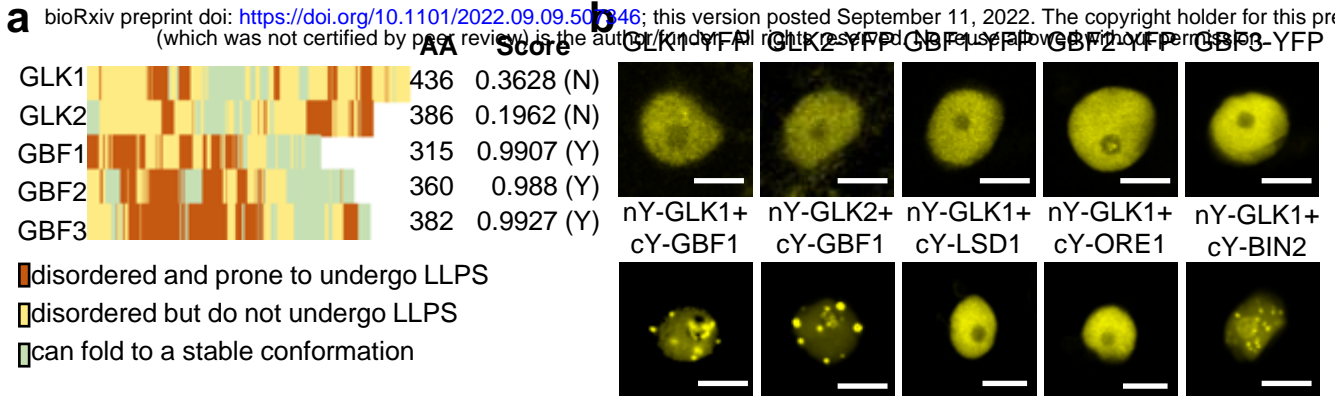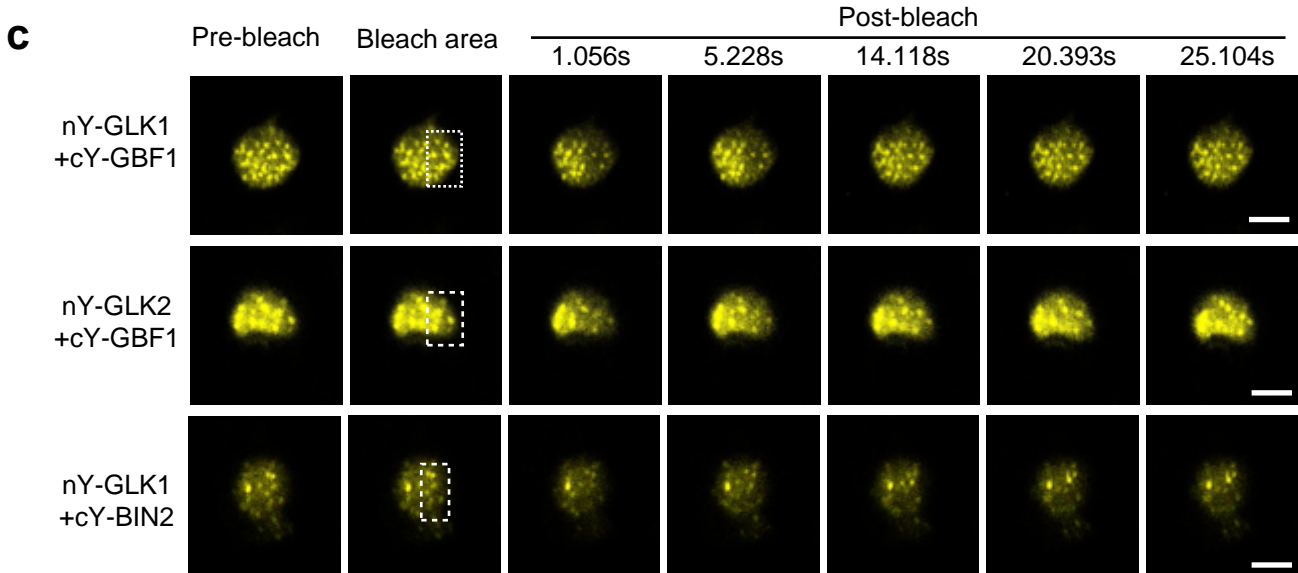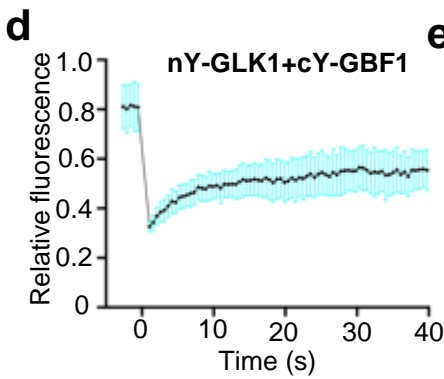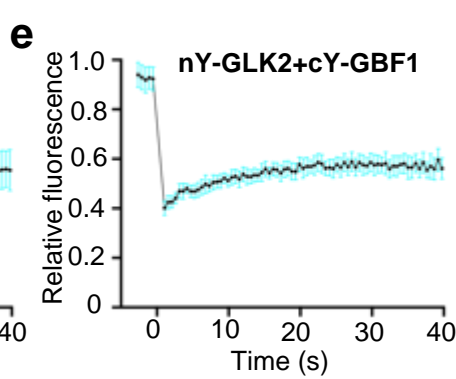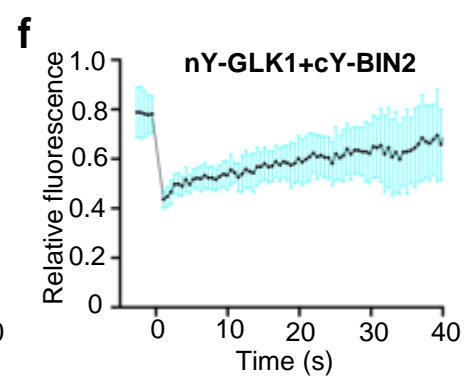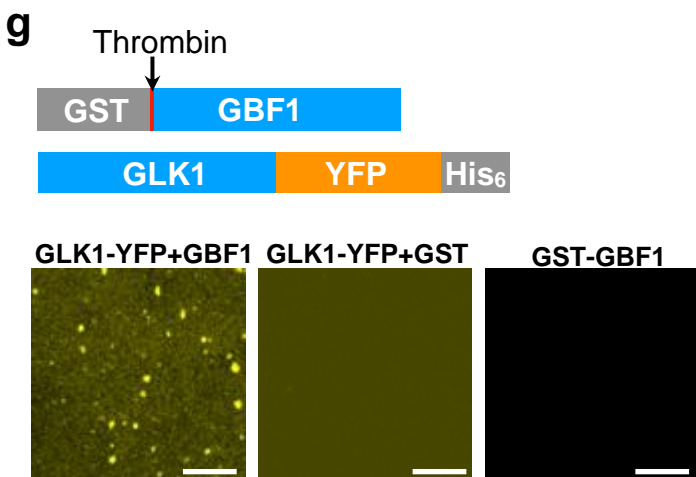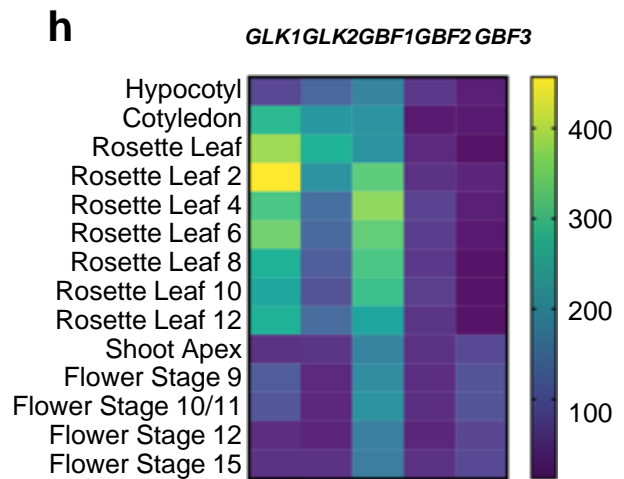

**Figure 5. GBF transcription factors mediate liquid-liquid phase separation of GLK-GBF regulatory complexes.** **a**, Prediction of phase separation domains by ParSe (<http://folding.chemistry.msstate.edu/utills/parse.html>) and protein phase separation scores by PSPredictor (<http://www.pkumdl.cn:8000/PSPredictor/>). **b**, Observation of nuclear condensates of YFP-fused proteins. LSD1, ORE1, and BIN2 are previously reported interaction partners of GLKs. **c-f**, FRAP images (**c**) and recovery curves of nY-GLK1+cY-GBF1 (**d**), nY-GLK2+cY-GBF1 (**e**), and nY-GLK1+cY-BIN2 (**f**), respectively. The transcription factor pairs were transiently expressed in *Nicotina benthamiana* leaf epidermal cells. The laser bleached area were indicated in the second frame. Data are representative of 5 nuclei for each protein pair. **g**, *In vitro* phase separation of GLK1 with GBF1. The schematics of protein fusions used for the assay are shown on top. The incorporation of GBF1 to GLK1-YFP fusion forms droplets but not GST protein. **h**, Expression pattern of GLKs and GBFs during leaf development stage. Data were acquired from Arabidopsis eFP browser (<http://bar.utoronto.ca>). Scale bars, 5  $\mu\text{m}$  (**b&c**) or 80  $\mu\text{m}$  (**g**).

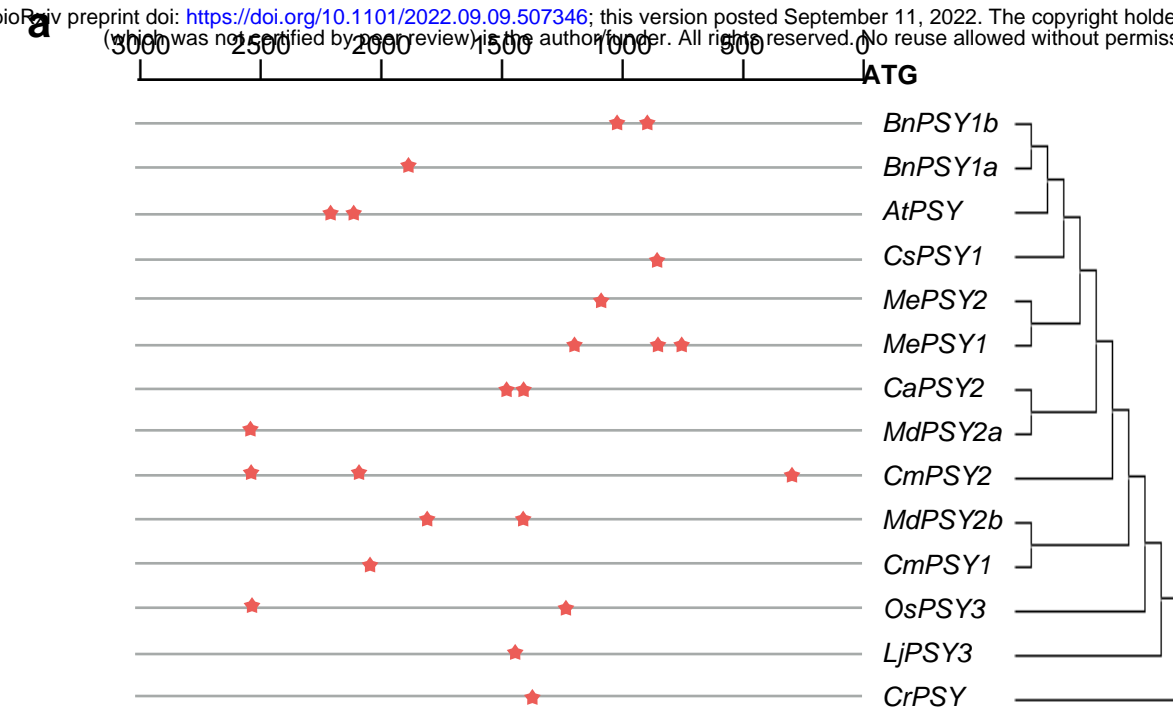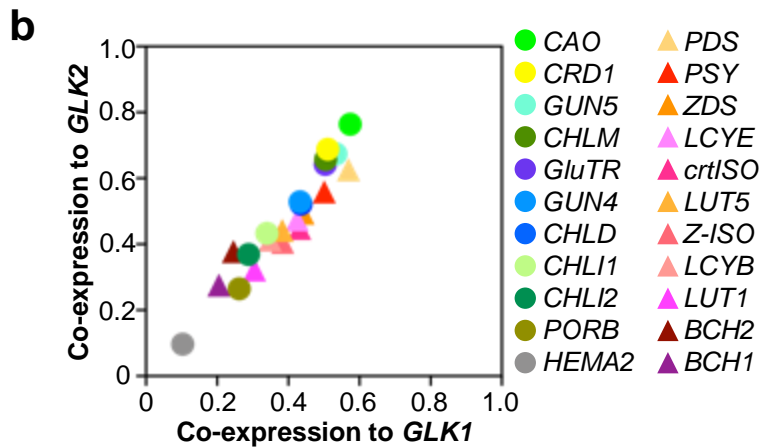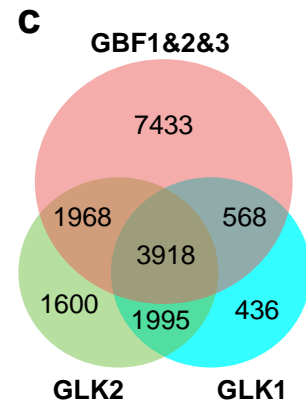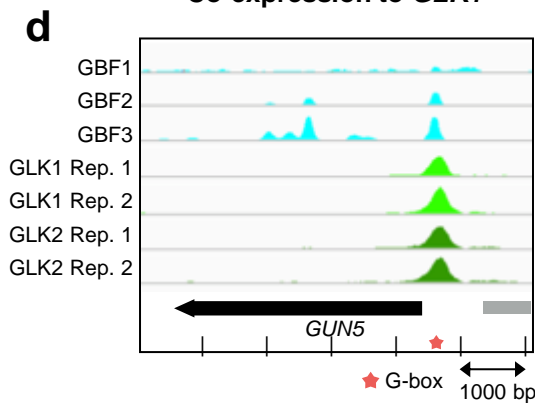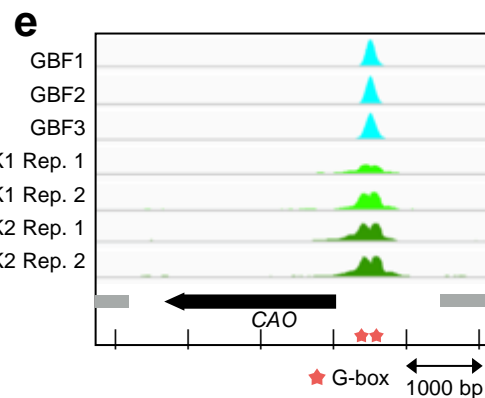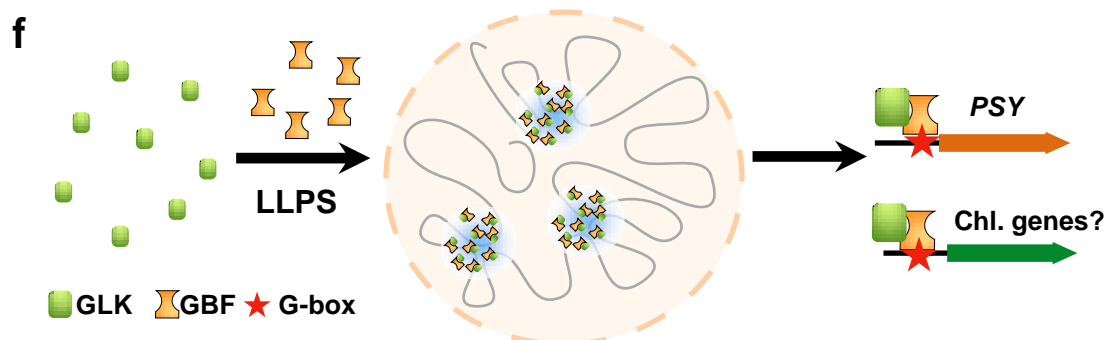

**Figure 6: Possible role of GLK-GBF complexes in coordinating chlorophyll and carotenoid biosynthesis in leaves.** **a**, Distribution of G-box motif in the 3000 bp promoter sequences of *PSY* genes. The 3000 bp sequences from start codon (ATG) were analyzed and the positions were estimated using the scale per 500 bp above. The phylogenetic tree was built by MEGA11 using Neighbor-Joining method based on the amino sequences of *PSY* without transit peptide. **b**, Co-expression analysis of chlorophyll and carotenoid biosynthesis pathway genes with *GLK1* and *GLK2*. The co-expression co-efficiency data were obtained from ATTEDII (<http://atted.jp>). **c**, Venn Diagram demonstrating common targets of GLK and GBF transcription factors based on publically available ChIP-seq data as described. **d&e**, Analysis of GLK and GBF binding peaks on *GUN5* (**d**) and *CAO* (**e**) promoters from ChIP-seq experiments. Stars indicate the presence of G-box motifs. **f**, A working model of GLK-GBF complexes in regulating carotenoid biosynthesis. GBFs interact with GLKs and induce the nuclear condensate formation, which trans-activate the expression of *PSY* through the direct binding of GBF to the G-box motif in the *PSY* promoter. The transcriptional complexes may also contribute to the regulation of chlorophyll biosynthesis since GLK and GBF can also bind to the G-box containing regions of chlorophyll biosynthetic genes (*GUN5* and *CAO*).



## Parsed Citations

Ahmad, R., Liu, Y., Wang, T.J., Meng, Q., Yin, H., Wang, X., Wu, Y., Nan, N., Liu, B., and Xu, ZY. (2019). GOLDEN2-LIKE transcription factors regulate WRKY40 expression in response to abscisic acid. *Plant Physiol* 179, 1844-1860.

Google Scholar: [Author Only](#) [Title Only](#) [Author and Title](#)

Alberti, S., Gladfelter, A., and Mittag, T. (2019). Considerations and challenges in studying liquid-liquid phase separation and biomolecular condensates. *Cell* 176, 419-434.

Google Scholar: [Author Only](#) [Title Only](#) [Author and Title](#)

Álvarez, D., Voss, B., Maass, D., Wüst, F., Schaub, P., Beyer, P., and Welsch, R. (2016). 5'UTR-mediated translational control of splice variants of phytoene synthase. *Plant Physiol*, pp. 01262.02016.

Google Scholar: [Author Only](#) [Title Only](#) [Author and Title](#)

Banani, S.F., Lee, H.O., Hyman, A.A., and Rosen, M.K. (2017). Biomolecular condensates: organizers of cellular biochemistry. *Nat Rev Mol Cell Biol* 18, 285-298.

Google Scholar: [Author Only](#) [Title Only](#) [Author and Title](#)

Bolger, A.M., Lohse, M., and Usadel, B. (2014). Trimmomatic: a flexible trimmer for Illumina sequence data. *Bioinformatics* 30, 2114-2120.

Google Scholar: [Author Only](#) [Title Only](#) [Author and Title](#)

Bou-Torrent, J., Toledo-Ortiz, G., Ortiz-Alcaide, M., Cifuentes-Esquivel, N., Halliday, K.J., Martínez-García, J.F., and Rodríguez-Concepción, M. (2015). Regulation of carotenoid biosynthesis by shade relies on specific subsets of antagonistic transcription factors and cofactors. *Plant Physiol* 169, 1584-1594.

Google Scholar: [Author Only](#) [Title Only](#) [Author and Title](#)

Chakrabortee, S., Kayatekin, C., Newby, G.A., Mendillo, M.L., Lancaster, A., and Lindquist, S. (2016). Luminidependens (LD) is an Arabidopsis protein with prion behavior. *Proc Natl Acad Sci U S A* 113, 6065-6070.

Google Scholar: [Author Only](#) [Title Only](#) [Author and Title](#)

Chen, D., Xu, G., Tang, W., Jing, Y., Ji, Q., Fei, Z., and Lin, R. (2013). Antagonistic basic helix-loop-helix/bZIP transcription factors form transcriptional modules that integrate light and reactive oxygen species signaling in Arabidopsis. *Plant Cell* 25, 1657-1673.

Google Scholar: [Author Only](#) [Title Only](#) [Author and Title](#)

Chen, M., Ji, M., Wen, B., Liu, L., Li, S., Chen, X., Gao, D., and Li, L. (2016). GOLDEN 2-LIKE transcription factors of plants. *Front Plant Sci* 7, 1509.

Google Scholar: [Author Only](#) [Title Only](#) [Author and Title](#)

Chu, X., Sun, T., Li, Q., Xu, Y., Zhang, Z., Lai, L., and Pei, J. (2022). Prediction of liquid-liquid phase separating proteins using machine learning. *BMC Bioinformatics* 23, 72.

Google Scholar: [Author Only](#) [Title Only](#) [Author and Title](#)

Corrêa, L.G.G., Riaño-Pachón, D.M., Schrago, C.G., Vicentini dos Santos, R., Mueller-Roeber, B., and Vincentz, M. (2008). The role of bZIP transcription factors in green plant evolution: adaptive features emerging from four founder genes. *PLoS one* 3, e2944.

Google Scholar: [Author Only](#) [Title Only](#) [Author and Title](#)

Cunningham Jr, F., and Gantt, E. (1998). Genes and enzymes of carotenoid biosynthesis in plants. *Annu Rev Plant Biol* 49, 557-583.

Google Scholar: [Author Only](#) [Title Only](#) [Author and Title](#)

Ding, Y., Sun, T., Ao, K., Peng, Y., Zhang, Y., Li, X., and Zhang, Y. (2018). Opposite roles of salicylic acid receptors NPR1 and NPR3/NPR4 in transcriptional regulation of plant immunity. *Cell* 173, 1454-1467.e1415.

Google Scholar: [Author Only](#) [Title Only](#) [Author and Title](#)

Dröge-Laser, W., Snoek, B.L., Snel, B., and Weiste, C. (2018). The Arabidopsis bZIP transcription factor family—an update. *Curr Opin Plant Biol* 45, 36-49.

Google Scholar: [Author Only](#) [Title Only](#) [Author and Title](#)

Emenecker, R.J., Holehouse, A.S., and Strader, L.C. (2021). Biological phase separation and biomolecular condensates in plants. *Annu Rev Plant Biol* 72, 17-46.

Google Scholar: [Author Only](#) [Title Only](#) [Author and Title](#)

Fang, X., Wang, L., Ishikawa, R., Li, Y., Fiedler, M., Liu, F., Calder, G., Rowan, B., Weigel, D., Li, P., and Dean, C. (2019). Arabidopsis FLL2 promotes liquid-liquid phase separation of polyadenylation complexes. *Nature* 569, 265-269.

Google Scholar: [Author Only](#) [Title Only](#) [Author and Title](#)

Fitter, D.W., Martin, D.J., Copley, M.J., Scotland, R.W., and Langdale, J.A. (2002). GLK gene pairs regulate chloroplast development in diverse plant species. *Plant J* 31, 713-727.

Google Scholar: [Author Only](#) [Title Only](#) [Author and Title](#)

**Friedman, J.S., Khanna, H., Swain, P.K., Denicola, R., Cheng, H., Mitton, K.P., Weber, C.H., Hicks, D., and Swaroop, A. (2004). The minimal transactivation domain of the basic motif-leucine zipper transcription factor NRL interacts with TATA-binding protein. *J Biol Chem* 279, 47233-47241.**

Google Scholar: [Author Only](#) [Title Only](#) [Author and Title](#)

**Gonzalez, A., Zhao, M., Leavitt, J.M., and Lloyd, A.M. (2008). Regulation of the anthocyanin biosynthetic pathway by the TTG1/bHLH/Myb transcriptional complex in Arabidopsis seedlings. *Plant J* 53, 814-827.**

Google Scholar: [Author Only](#) [Title Only](#) [Author and Title](#)

**Huq, E., Al-Sady, B., Hudson, M., Kim, C., Apel, K., and Quail, P.H. (2004). Phytochrome-interacting factor 1 is a critical bHLH regulator of chlorophyll biosynthesis. *Science* 305, 1937-1941.**

Google Scholar: [Author Only](#) [Title Only](#) [Author and Title](#)

**Jin, X., Baysal, C., Drupal, M., Sheng, Y., Huang, X., He, W., Shi, L., Capell, T., Fraser, P.D., and Christou, P. (2021). The Coordinated upregulated expression of genes involved in MEP, chlorophyll, carotenoid and tocopherol pathways, mirrored the corresponding metabolite contents in rice leaves during de-etiolation. *Plants* 10, 1456.**

Google Scholar: [Author Only](#) [Title Only](#) [Author and Title](#)

**Kim, J., Lee, H., Lee, H.G., and Seo, P.J. (2021). Get closer and make hotspots: liquid-liquid phase separation in plants. *EMBO Rep* 22, e51656.**

Google Scholar: [Author Only](#) [Title Only](#) [Author and Title](#)

**Kobayashi, K., Baba, S., Obayashi, T., Sato, M., Toyooka, K., Keränen, M., Aro, E.-M., Fukaki, H., Ohta, H., and Sugimoto, K. (2012). Regulation of root greening by light and auxin/cytokinin signaling in Arabidopsis. *Plant Cell* 24, 1081-1095.**

Google Scholar: [Author Only](#) [Title Only](#) [Author and Title](#)

**Kobayashi, K., Sasaki, D., Noguchi, K., Fujinuma, D., Komatsu, H., Kobayashi, M., Sato, M., Toyooka, K., Sugimoto, K., and Niyogi, K.K. (2013). Photosynthesis of root chloroplasts developed in Arabidopsis lines overexpressing GOLDEN2-LIKE transcription factors. *Plant Cell Physiol* 54, 1365-1377.**

Google Scholar: [Author Only](#) [Title Only](#) [Author and Title](#)

**Kurihara, Y., Makita, Y., Shimohira, H., and Matsui, M. (2020). Time-course transcriptome study reveals mode of bZIP transcription factors on light exposure in Arabidopsis. *IJMS* 21, 1993.**

Google Scholar: [Author Only](#) [Title Only](#) [Author and Title](#)

**Langmead, B., and Salzberg, S.L. (2012). Fast gapped-read alignment with Bowtie 2. *Nat Methods* 9, 357-359.**

Google Scholar: [Author Only](#) [Title Only](#) [Author and Title](#)

**Li, M., Lee, K.P., Liu, T., Dogra, V., Duan, J., Li, M., Xing, W., and Kim, C. (2022). Antagonistic modules regulate photosynthesis-associated nuclear genes via GOLDEN2-LIKE transcription factors. *Plant Physiol* 188, 2308-2324.**

Google Scholar: [Author Only](#) [Title Only](#) [Author and Title](#)

**Li, X., Wang, P., Li, J., Wei, S., Yan, Y., Yang, J., Zhao, M., Langdale, J.A., and Zhou, W. (2020). Maize GOLDEN2-LIKE genes enhance biomass and grain yields in rice by improving photosynthesis and reducing photoinhibition. *Commun Biol* 3, 1-12.**

Google Scholar: [Author Only](#) [Title Only](#) [Author and Title](#)

**Llorca, C.M., Berendzen, K.W., Malik, W.A., Mahn, S., Piepho, H.-P., and Zentgraf, U. (2015). The elucidation of the interactome of 16 Arabidopsis bZIP factors reveals three independent functional networks. *PLoS One* 10, e0139884.**

Google Scholar: [Author Only](#) [Title Only](#) [Author and Title](#)

**Lu, S., Ye, J., Zhu, K., Zhang, Y., Zhang, M., Xu, Q., and Deng, X. (2021). A fruit ripening-associated transcription factor CsMADS5 positively regulates carotenoid biosynthesis in citrus. *J Exp Bot* 72, 3028-3043.**

Google Scholar: [Author Only](#) [Title Only](#) [Author and Title](#)

**Maass, D., Arango, J., Wüst, F., Beyer, P., and Welsch, R. (2009). Carotenoid crystal formation in Arabidopsis and carrot roots caused by increased phytoene synthase protein levels. *PLoS one* 4, e6373.**

Google Scholar: [Author Only](#) [Title Only](#) [Author and Title](#)

**Martín, G., Leivar, P., Ludevid, D., Tepperman, J.M., Quail, P.H., and Monte, E. (2016). Phytochrome and retrograde signalling pathways converge to antagonistically regulate a light-induced transcriptional network. *Nat Commun* 7, 11431.**

Google Scholar: [Author Only](#) [Title Only](#) [Author and Title](#)

**Martínez, C., Espinosa-Ruiz, A., de Lucas, M., Bernardo-García, S., Franco-Zorrilla, J.M., and Prat, S. (2018). PIF4-induced BR synthesis is critical to diurnal and thermomorphogenic growth. *EMBO J* 37.**

Google Scholar: [Author Only](#) [Title Only](#) [Author and Title](#)

**Menkens, A.E., Schindler, U., and Cashmore, A.R. (1995). The G-box: a ubiquitous regulatory DNA element in plants bound by the GBF family of bZIP proteins. *Trends Biochem Sci* 20, 506-510.**

Google Scholar: [Author Only](#) [Title Only](#) [Author and Title](#)

**Moon, J., Zhu, L., Shen, H., and Huq, E. (2008). PIF1 directly and indirectly regulates chlorophyll biosynthesis to optimize the greening process in Arabidopsis. Proc Natl Acad Sci U S A 105, 9433-9438.**

Google Scholar: [Author Only](#) [Title Only](#) [Author and Title](#)

**Murmu, J., Wilton, M., Allard, G., Pandeya, R., Desveaux, D., Singh, J., and Subramaniam, R. (2014). Arabidopsis GOLDEN2-LIKE (GLK) transcription factors activate jasmonic acid (JA)-dependent disease susceptibility to the biotrophic pathogen *Hyaloperonospora arabidopsidis*, as well as JA-independent plant immunity against the necrotrophic pathogen *Botrytis cinerea*. Mol Plant Pathol 15, 174-184.**

Google Scholar: [Author Only](#) [Title Only](#) [Author and Title](#)

**Nakagawa, T., Suzuki, T., Murata, S., Nakamura, S., Hino, T., Maeo, K., Tabata, R., Kawai, T., Tanaka, K., Niwa, Y., Watanabe, Y., Nakamura, K., Kimura, T., and Ishiguro, S. (2007). Improved Gateway binary vectors: high-performance vectors for creation of fusion constructs in transgenic analysis of plants. Biosci Biotechnol Biochem 71, 2095-2100.**

Google Scholar: [Author Only](#) [Title Only](#) [Author and Title](#)

**Nakamura, H., Muramatsu, M., Hakata, M., Ueno, O., Nagamura, Y., Hirochika, H., Takano, M., and Ichikawa, H. (2009). Ectopic overexpression of the transcription factor OsGLK1 induces chloroplast development in non-green rice cells. Plant Cell Physiol 50, 1933-1949.**

Google Scholar: [Author Only](#) [Title Only](#) [Author and Title](#)

**Nguyen, C.V., Vrebalov, J.T., Gapper, N.E., Zheng, Y., Zhong, S., Fei, Z., and Giovannoni, J.J. (2014). Tomato GOLDEN2-LIKE transcription factors reveal molecular gradients that function during fruit development and ripening. Plant Cell 26, 585-601.**

Google Scholar: [Author Only](#) [Title Only](#) [Author and Title](#)

**Ni, F., Wu, L., Wang, Q., Hong, J., Qi, Y., and Zhou, X. (2017). Turnip Yellow Mosaic Virus P69 Interacts with and Suppresses GLK Transcription Factors to Cause Pale-Green Symptoms in Arabidopsis. Mol Plant 10, 764-766.**

Google Scholar: [Author Only](#) [Title Only](#) [Author and Title](#)

**Nusinow, D.A., Helfer, A., Hamilton, E.E., King, J.J., Imaizumi, T., Schultz, T.F., Farré, E.M., and Kay, S.A. (2011). The ELF4-ELF3-LUX complex links the circadian clock to diurnal control of hypocotyl growth. Nature 475, 398-402.**

Google Scholar: [Author Only](#) [Title Only](#) [Author and Title](#)

**Obayashi, T., Aoki, Y., Tadaka, S., Kagaya, Y., and Kinoshita, K. (2018). ATTED-II in 2018: A Plant Coexpression Database Based on Investigation of the Statistical Property of the Mutual Rank Index. Plant Cell Physiol 59, e3.**

Google Scholar: [Author Only](#) [Title Only](#) [Author and Title](#)

**Paiz, E.A., Allen, J.H., Correia, J.J., Fitzkee, N.C., Hough, L.E., and Whitten, S.T. (2021). Beta turn propensity and a model polymer scaling exponent identify intrinsically disordered phase-separating proteins. J Biol Chem 297, 101343.**

Google Scholar: [Author Only](#) [Title Only](#) [Author and Title](#)

**Powell, A.L., Nguyen, C.V., Hill, T., Cheng, K.L., Figueroa-Balderas, R., Aktas, H., Ashrafi, H., Pons, C., Fernández-Muñoz, R., Vicente, A., Lopez-Baltazar, J., Barry, C.S., Liu, Y., Chetelat, R., Granell, A., Deynze, A.V., Giovannoni, J.J., and Bennett, A.B. (2012). Uniform ripening encodes a Golden 2-like transcription factor regulating tomato fruit chloroplast development. Science 336, 1711-1715.**

Google Scholar: [Author Only](#) [Title Only](#) [Author and Title](#)

**Rauf, M., Arif, M., Dortay, H., Matallana-Ramírez, L.P., Waters, M.T., Gil Nam, H., Lim, P.O., Mueller-Roeber, B., and Balazadeh, S. (2013). ORE1 balances leaf senescence against maintenance by antagonizing G2-like-mediated transcription. EMBO Rep 14, 382-388.**

Google Scholar: [Author Only](#) [Title Only](#) [Author and Title](#)

**Robinson, J.T., Thorvaldsdóttir, H., Winckler, W., Guttman, M., Lander, E.S., Getz, G., and Mesirov, J.P. (2011). Integrative genomics viewer. Nat Biotechnol 29, 24-26.**

Google Scholar: [Author Only](#) [Title Only](#) [Author and Title](#)

**Rossini, L., Cribb, L., Martin, D.J., and Langdale, J.A. (2001). The maize golden2 gene defines a novel class of transcriptional regulators in plants. Plant Cell 13, 1231-1244.**

Google Scholar: [Author Only](#) [Title Only](#) [Author and Title](#)

**Ruiz-Sola, M.Á., and Rodríguez-Concepción, M. (2012). Carotenoid biosynthesis in Arabidopsis: a colorful pathway. The Arabidopsis book/American Society of Plant Biologists 10.**

Google Scholar: [Author Only](#) [Title Only](#) [Author and Title](#)

**Sabari, B.R., Dall'Agnese, A., and Young, R.A. (2020). Biomolecular condensates in the nucleus. Trends Biochem Sci 45, 961-977.**

Google Scholar: [Author Only](#) [Title Only](#) [Author and Title](#)

**Schaub, P., Rodriguez-Franco, M., Cazzonelli, C.I., Álvarez, D., Wüst, F., and Welsch, R. (2018). Establishment of an Arabidopsis callus system to study the interrelations of biosynthesis, degradation and accumulation of carotenoids. PloS one 13, e0192158.**

Google Scholar: [Author Only](#) [Title Only](#) [Author and Title](#)

- Schneider, C.A., Rasband, W.S., and Eliceiri, K.W. (2012). NIH Image to ImageJ: 25 years of image analysis. *Nat Methods* 9, 671-675.  
Google Scholar: [Author Only](#) [Title Only](#) [Author and Title](#)
- Shen, W. (2021). An investigation of transcription factor regulatory mechanism in plants (Ann Arbor: The Chinese University of Hong Kong (Hong Kong)), pp. 137.  
Google Scholar: [Author Only](#) [Title Only](#) [Author and Title](#)
- Singh, A., Ram, H., Abbas, N., and Chattopadhyay, S. (2012). Molecular interactions of GBF1 with HY5 and HYH proteins during light-mediated seedling development in *Arabidopsis thaliana*. *J Biol Chem* 287, 25995-26009.  
Google Scholar: [Author Only](#) [Title Only](#) [Author and Title](#)
- Smykowski, A., Zimmermann, P., and Zentgraf, U. (2010). G-Box binding factor1 reduces CATALASE2 expression and regulates the onset of leaf senescence in *Arabidopsis*. *Plant Physiol* 153, 1321-1331.  
Google Scholar: [Author Only](#) [Title Only](#) [Author and Title](#)
- Stanley, L., and Yuan, Y.-W. (2019). Transcriptional regulation of carotenoid biosynthesis in plants: So many regulators, so little consensus. *Front Plant Sci* 10, 1017.  
Google Scholar: [Author Only](#) [Title Only](#) [Author and Title](#)
- Sun, T., and Li, L. (2020). Toward the 'golden'era: the status in uncovering the regulatory control of carotenoid accumulation in plants. *Plant Sci* 290, 110331.  
Google Scholar: [Author Only](#) [Title Only](#) [Author and Title](#)
- Sun, T., Rao, S., Zhou, X., and Li, L. (2022a). Plant carotenoids: recent advances and future perspectives. *Mol Hortic* 2, 1-21.  
Google Scholar: [Author Only](#) [Title Only](#) [Author and Title](#)
- Sun, T., Zhou, X., Rao, S., Liu, J., and Li, L. (2022b). Protein-protein interaction techniques to investigate post-translational regulation of carotenogenesis. *Methods in Enzymology* 671, 301-325.  
Google Scholar: [Author Only](#) [Title Only](#) [Author and Title](#)
- Sun, T., Yuan, H., Chen, C., Kadirjan-Kalbach, D.K., Mazourek, M., Osteryoung, K.W., and Li, L. (2020). ORHis, a natural variant of OR, specifically interacts with plastid division factor ARC3 to regulate chromoplast number and carotenoid accumulation. *Mol Plant* 13, 864-878.  
Google Scholar: [Author Only](#) [Title Only](#) [Author and Title](#)
- Sun, T., Zhou, F., Huang, X.-Q., Chen, W.-C., Kong, M.-J., Zhou, C.-F., Zhuang, Z., Li, L., and Lu, S. (2019). ORANGE represses chloroplast biogenesis in etiolated *Arabidopsis* cotyledons via interaction with TCP14. *Plant Cell* 31, 2996-3014.  
Google Scholar: [Author Only](#) [Title Only](#) [Author and Title](#)
- Sun, T., Wang, P., Lu, S., Yuan, H., Yang, Y., Fish, T., Thannhauser, T., Liu, J., Mazourek, M., Grimm, B., and Li, L. (2022c). Orchestration of chlorophyll and carotenoid biosynthesis by ORANGE family proteins in plant. *BioRxiv*, 2022.2002.2008.479616.  
Google Scholar: [Author Only](#) [Title Only](#) [Author and Title](#)
- Szklarczyk, D., Gable, A.L., Lyon, D., Junge, A., Wyder, S., Huerta-Cepas, J., Simonovic, M., Doncheva, N.T., Morris, J.H., and Bork, P. (2019). STRING v11: protein-protein association networks with increased coverage, supporting functional discovery in genome-wide experimental datasets. *Nucleic Acids Res* 47, D607-D613.  
Google Scholar: [Author Only](#) [Title Only](#) [Author and Title](#)
- Tamai, H., Iwabuchi, M., and Meshi, T. (2002). *Arabidopsis* GARP transcriptional activators interact with the Pro-rich activation domain shared by G-box-binding bZIP factors. *Plant Cell Physiol* 43, 99-107.  
Google Scholar: [Author Only](#) [Title Only](#) [Author and Title](#)
- Toledo-Ortiz, G., Huq, E., and Rodríguez-Concepción, M. (2010). Direct regulation of phytoene synthase gene expression and carotenoid biosynthesis by phytochrome-interacting factors. *Proceedings of the National Academy of Sciences* 107, 11626-11631.  
Google Scholar: [Author Only](#) [Title Only](#) [Author and Title](#)
- Toledo-Ortiz, G., Johansson, H., Lee, K.P., Bou-Torrent, J., Stewart, K., Steel, G., Rodríguez-Concepción, M., and Halliday, K.J. (2014). The HY5-PIF regulatory module coordinates light and temperature control of photosynthetic gene transcription. *PLoS Genet* 10.  
Google Scholar: [Author Only](#) [Title Only](#) [Author and Title](#)
- Tu, X., Mejía-Guerra, M.K., Valdes Franco, J.A., Tzeng, D., Chu, P.-Y., Shen, W., Wei, Y., Dai, X., Li, P., and Buckler, E.S. (2020). Reconstructing the maize leaf regulatory network using ChIP-seq data of 104 transcription factors. *Nat Commun* 11, 1-13.  
Google Scholar: [Author Only](#) [Title Only](#) [Author and Title](#)
- Waters, M.T., and Langdale, J.A. (2009). The making of a chloroplast. *EMBO J* 28, 2861-2873.  
Google Scholar: [Author Only](#) [Title Only](#) [Author and Title](#)
- Waters, M.T., Moylan, E.C., and Langdale, J.A. (2008). GLK transcription factors regulate chloroplast development in a cell-autonomous manner. *Plant J* 56, 432-444.



Google Scholar: [Author Only](#) [Title Only](#) [Author and Title](#)

**Waters, M.T., Wang, P., Korkaric, M., Capper, R.G., Saunders, N.J., and Langdale, J.A. (2009). GLK transcription factors coordinate expression of the photosynthetic apparatus in Arabidopsis. *Plant Cell* 21, 1109-1128.**

Google Scholar: [Author Only](#) [Title Only](#) [Author and Title](#)

**Welsch, R., Zhou, X., Yuan, H., Álvarez, D., Sun, T., Schlossarek, D., Yang, Y., Shen, G., Zhang, H., Rodriguez-Concepcion, M., Thannhauser, T.W., and Li, L. (2018). Clp protease and OR directly control the proteostasis of phytoene synthase, the crucial enzyme for carotenoid biosynthesis in Arabidopsis. *Mol Plant* 11, 149-162.**

Google Scholar: [Author Only](#) [Title Only](#) [Author and Title](#)

**Wu, M., Xu, X., Hu, X., Liu, Y., Cao, H., Chan, H., Gong, Z., Yuan, Y., Luo, Y., Feng, B., Li, Z., and Deng, W. (2020). SIMYB72 regulates the metabolism of chlorophylls, carotenoids, and flavonoids in tomato fruit. *Plant Physiol* 183, 854-868.**

Google Scholar: [Author Only](#) [Title Only](#) [Author and Title](#)

**Xie, D., Chen, M., Niu, J., Wang, L., Li, Y., Fang, X., Li, P., and Qi, Y. (2021). Phase separation of SERRATE drives dicing body assembly and promotes miRNA processing in Arabidopsis. *Nat Cell Biol* 23, 32-39.**

Google Scholar: [Author Only](#) [Title Only](#) [Author and Title](#)

**Xie, X., Ma, X., Zhu, Q., Zeng, D., Li, G., and Liu, Y.G. (2017). CRISPR-GE: a convenient software toolkit for CRISPR-based genome editing. *Mol Plant* 10, 1246-1249.**

Google Scholar: [Author Only](#) [Title Only](#) [Author and Title](#)

**Xiong, C., Luo, D., Lin, A., Zhang, C., Shan, L., He, P., Li, B., Zhang, Q., Hua, B., Yuan, Z., Li, H., Zhang, J., Yang, C., Lu, Y., Ye, Z., and Wang, T. (2019). A tomato B-box protein SIBBX20 modulates carotenoid biosynthesis by directly activating PHYTOENE SYNTHASE 1, and is targeted for 26S proteasome-mediated degradation. *New Phytol* 221, 279-294.**

Google Scholar: [Author Only](#) [Title Only](#) [Author and Title](#)

**Xu, K., Huang, X., Wu, M., Wang, Y., Chang, Y., Liu, K., Zhang, J., Zhang, Y., Zhang, F., Yi, L., Li, T., Wang, R., Tan, G., and Li, C. (2014). A rapid, highly efficient and economical method of Agrobacterium-mediated in planta transient transformation in living onion epidermis. *PLoS One* 9, e83556.**

Google Scholar: [Author Only](#) [Title Only](#) [Author and Title](#)

**Yasumura, Y., Moylan, E.C., and Langdale, J.A. (2005). A conserved transcription factor mediates nuclear control of organelle biogenesis in anciently diverged land plants. *Plant Cell* 17, 1894-1907.**

Google Scholar: [Author Only](#) [Title Only](#) [Author and Title](#)

**Yazdani, M., Sun, Z., Yuan, H., Zeng, S., Thannhauser, T.W., Vrebalov, J., Ma, Q., Xu, Y., Fei, Z., Van Eck, J., Tian, S., Tadmor, Y., Giovannoni, J.J., and Li, L. (2019). Ectopic expression of ORANGE promotes carotenoid accumulation and fruit development in tomato. *Plant Biotechnol J* 17, 33-49.**

Google Scholar: [Author Only](#) [Title Only](#) [Author and Title](#)

**Yeh, S.-Y., Lin, H.-H., Chang, Y.-M., Chang, Y.-L., Chang, C.-K., Huang, Y.-C., Ho, Y.-W., Lin, C.-Y., Zheng, J.-Z., Jane, W.-N., Ng, C.-Y., Lu, M.-Y., Lai, I.-L., To, K.-Y., Li, W.-H., and Ku, M.S.B. (2022). Maize Golden2-like transcription factors boost rice chloroplast development, photosynthesis, and grain yield. *Plant Physiol* 188, 442-459.**

Google Scholar: [Author Only](#) [Title Only](#) [Author and Title](#)

**Yu, H., and Zhao, Y. (2019). Fluorescence Marker-Assisted Isolation of Cas9-Free and CRISPR-Edited Arabidopsis Plants. In *Plant Genome Editing with CRISPR Systems: Methods and Protocols*, Y. Qi, ed (New York, NY: Springer New York), pp. 147-154.**

Google Scholar: [Author Only](#) [Title Only](#) [Author and Title](#)

**Yuan, H., Owsiany, K., Sheeja, T., Zhou, X., Rodriguez, C., Li, Y., Welsch, R., Chayut, N., Yang, Y., Thannhauser, T.W., Mandayam V Parthasarathy, Qiang Xu, Xiuxin Deng, Zhangjun Fei, Ari Schaffer, Nurit Katzir, Joseph Burger, Yaakov Tadmor, and Li, L. (2015). A single amino acid substitution in an ORANGE protein promotes carotenoid overaccumulation in Arabidopsis. *Plant Physiol* 169, 421-431.**

Google Scholar: [Author Only](#) [Title Only](#) [Author and Title](#)

**Zhang, D., Tan, W., Yang, F., Han, Q., Deng, X., Guo, H., Liu, B., Yin, Y., and Lin, H. (2021). A BIN2-GLK1 signaling module integrates brassinosteroid and light signaling to repress chloroplast development in the dark. *Dev Cell* 56, 310-324. e317.**

Google Scholar: [Author Only](#) [Title Only](#) [Author and Title](#)

**Zhang, Y., Liu, T., Meyer, C.A., Eeckhoute, J., Johnson, D.S., Bernstein, B.E., Nusbaum, C., Myers, R.M., Brown, M., Li, W., and Liu, S.X. (2008). Model-based analysis of ChIP-Seq (MACS). *Genome Biology* 9, 1-9.**

Google Scholar: [Author Only](#) [Title Only](#) [Author and Title](#)

**Zhao, D., Zheng, Y., Yang, L., Yao, Z., Cheng, J., Zhang, F., Jiang, H., and Liu, D. (2021). The transcription factor AtGLK1 acts upstream of MYBL2 to genetically regulate sucrose-induced anthocyanin biosynthesis in Arabidopsis. *BMC Plant Biol* 21, 242.**

Google Scholar: [Author Only](#) [Title Only](#) [Author and Title](#)

**Zhou, F., Sun, T.H., Zhao, L., Pan, X.W., and Lu, S. (2015a). The bZIP transcription factor HY5 interacts with the promoter of the**

**monoterpene synthase gene QH6 in modulating its rhythmic expression. *Front Plant Sci* 6, 304.**

Google Scholar: [Author Only](#) [Title Only](#) [Author and Title](#)

**Zhou, X., Rao, S., Wrightstone, E., Sun, T., Lui, A., Welsch, R., and Li, L. (2022). Phytoene synthase: the key rate-limiting enzyme of carotenoid biosynthesis in plants. *Front Plant Sci*, 977.**

Google Scholar: [Author Only](#) [Title Only](#) [Author and Title](#)

**Zhou, X., Welsch, R., Yang, Y., Álvarez, D., Riediger, M., Yuan, H., Fish, T., Liu, J., Thannhauser, T.W., and Li, L. (2015b). Arabidopsis OR proteins are the major posttranscriptional regulators of phytoene synthase in controlling carotenoid biosynthesis. *Proceedings of the National Academy of Sciences* 112, 3558-3563.**

Google Scholar: [Author Only](#) [Title Only](#) [Author and Title](#)

**Zhou, Z., Bi, G., and Zhou, J.M. (2018). Luciferase complementation assay for protein-protein interactions in plants. *Curr Ptotoc Plant Biol* 3, 42-50.**

Google Scholar: [Author Only](#) [Title Only](#) [Author and Title](#)

**Zhu, J.Y., Oh, E., Wang, T., and Wang, Z.Y. (2016). TOC1-PIF4 interaction mediates the circadian gating of thermoresponsive growth in *Arabidopsis*. *Nat Commun* 7, 13692.**

Google Scholar: [Author Only](#) [Title Only](#) [Author and Title](#)

**Zhu, K., Sun, Q., Chen, H., Mei, X., Lu, S., Ye, J., Chai, L., Xu, Q., and Deng, X. (2021a). Ethylene activation of carotenoid biosynthesis by a novel transcription factor CsERF061. *J Exp Bot* 72, 3137-3154.**

Google Scholar: [Author Only](#) [Title Only](#) [Author and Title](#)

**Zhu, P., Lister, C., and Dean, C. (2021b). Cold-induced *Arabidopsis* FRIGIDA nuclear condensates for FLC repression. *Nature* 599, 657-661.**

Google Scholar: [Author Only](#) [Title Only](#) [Author and Title](#)

**Zubo, Y.O., Blakley, I.C., Franco-Zorrilla, J.M., Yamburenko, M.V., Solano, R., Kieber, J.J., Loraine, A.E., and Schaller, G.E. (2018). Coordination of chloroplast development through the action of the GNC and GLK transcription factor families. *Plant Physiol* 178, 130-147.**

Google Scholar: [Author Only](#) [Title Only](#) [Author and Title](#)
